1 **Crystal structures of glycoprotein D of equine**  
2 **alphaherpesviruses reveal potential binding sites to the**  
3 **entry receptor MHC-I**

4 Viviane Kremling<sup>1\*</sup>, Bernhard Loll<sup>2</sup>, Szymon Pach<sup>3</sup>, Ismail Dahmani<sup>4</sup>, Christoph Weise<sup>5</sup>,  
5 Gerhard Wolber<sup>3</sup>, Salvatore Chiantia<sup>4</sup>, Markus C. Wahl<sup>2,6</sup>, Nikolaus Osterrieder<sup>1,7</sup>, Walid  
6 Azab<sup>1\*</sup>

7 <sup>1</sup> Institut für Virologie, Robert von Ostertag-Haus, Zentrum für Infektionsmedizin, Freie  
8 Universität Berlin, Berlin, Germany,

9 <sup>2</sup> Laboratory of Structural Biochemistry, Freie Universität Berlin, Berlin, Germany,

10 <sup>3</sup> Institute of Pharmacy (Pharmaceutical Chemistry), Freie Universität Berlin, Berlin,  
11 Germany,

12 <sup>4</sup> Universität Potsdam, Institut für Biochemie und Biologie, Potsdam, Brandenburg,  
13 Germany,

14 <sup>5</sup> BioSupraMol Core Facility, Bio-Mass Spectrometry, Freie Universität Berlin, Berlin,  
15 Germany

16 <sup>6</sup> Helmholtz-Zentrum Berlin für Materialien und Energie, Macromolecular  
17 Crystallography, Berlin, Germany

18 <sup>7</sup> Department of Infectious Diseases and Public Health, City University of Hong Kong,  
19 Kowloon Tong, Hong Kong

20

21 \*Corresponding authors:

22 E-mail: [walid.azab@fu-berlin.de](mailto:walid.azab@fu-berlin.de) (WA)

23 E-mail: [viviane.kremling@fu-berlin.de](mailto:viviane.kremling@fu-berlin.de) (VK)

## 24 **Abstract**

25 Cell entry of most alphaherpesviruses is mediated by the binding of glycoprotein D (gD) to  
26 different cell surface receptors. Equine herpesvirus type 1 (EHV-1) and EHV-4 gDs interact  
27 with equine major histocompatibility complex I (MHC-I) to initiate entry into equine cells.  
28 We have characterized the gD-MHC-I interaction by solving the crystal structures of EHV-1  
29 and EHV-4 gDs (gD1, gD4), performing protein-protein docking simulations, surface plasmon  
30 resonance (SPR) analysis, and biological assays. The structures of gD1 and gD4 revealed the  
31 existence of a common V-set immunoglobulin-like (IgV-like) core comparable to those of other  
32 gD homologs. Molecular modeling yielded plausible binding hypotheses and identified key  
33 residues (F213 and D261) that are important for virus binding. Altering the key residues  
34 resulted in impaired virus growth in cells, which highlights the important role of these residues  
35 in the gD-MHC-I interaction. Taken together, our results add to our understanding of the  
36 initial herpesvirus-cell interactions and will contribute to the targeted design of antiviral  
37 drugs and vaccine development.

38

## 39 **Author summary**

40 Equine herpesvirus type 1 (EHV-1) and type 4 (EHV-4) are endemic in horses and cause great  
41 suffering as well as substantial economic losses to the equine industry. Current vaccines do  
42 not prevent infections and treatment is difficult. A prerequisite for vaccine and drug  
43 development is an in-depth understanding of the virus replication cycle, especially the virus  
44 entry process in order to block the infection at early stages. Entry of alphaherpesviruses into  
45 the host cell is mediated by a set of virus envelope glycoproteins including glycoprotein D  
46 (gD) that triggers the internalization of the virus particle. The structure of gD and the  
47 interaction with the entry receptor equine major histocompatibility complex class I (MHC-I)  
48 remains elusive. Here, we solved the crystal structures of gD1 and gD4 that allowed us to

49 model virus-receptor interaction and to determine the key residues for virus entry. Alterations  
50 of these key residues impaired virus growth in cell culture. The overall structure of gD1 and  
51 gD4 shows classical features of other alphaherpesvirus gDs making it possible to gain further  
52 insights into human pathogens as well.

53

## 54 **Introduction**

55 One of the most essential steps for virus replication is the entry process into host cells. In  
56 herpesviruses, more specifically alphaherpesviruses, cell entry is a complex multistep process  
57 that requires a stepwise contribution of five out of twelve envelope glycoproteins, namely  
58 glycoprotein B (gB), gC, gD, and the heterodimer gH/gL [1]. Of these, gD is the (main)  
59 receptor-binding protein that interacts with the cell receptors and triggers the subsequent  
60 fusion process with cell membrane and/or uptake by endocytosis [2–4].  
61 Equine herpesvirus type 1 (EHV-1) and EHV-4 use equine major histocompatibility complex  
62 class I (MHC-I) as an entry receptor, however, no details of the molecular binding mode are  
63 available [5–7]. Only few other viruses are known to utilize MHC molecules as binding  
64 receptors but not as entry receptors. Coxsackievirus A9 requires MHC-I and GRP78 as co-  
65 receptors for virus internalization [8], Simian virus 40 (SV40) binds to cellular MHC-I,  
66 however, MHC-I does not mediate virus entry [9,10]. The fiber knob of Adenovirus type 5  
67 (AdV-5) binds to the  $\alpha 2$  region of human leukocyte antigen (HLA) [11], and the functional gD  
68 homolog gp42 in Epstein-Barr Virus (EBV) binds to MHC-II to activate membrane fusion  
69 [12].  
70 MHC-I seems to be an unlikely receptor for viral entry since it is present on all somatic  
71 cells [13] and therefore does not confer tissue specificity. Additionally, it is one of the most  
72 polymorphic mammalian proteins with 10 to 25% difference in the amino acid sequence  
73 [14,15]. Typically, MHC-I plays a crucial role in the adaptive immunity by presenting

74 proteolytically processed intracellular proteins on the cell surface to T-cells and natural killer  
75 cells [16]. In case of an infected cell, virus-derived peptides are presented and the recognition  
76 by T-cell receptor (TCR) initiates an immune response [17]. Although utilized by EHV-1 and  
77 EHV-4 as entry receptors, not all MHC-I genes support the entry of both viruses [5,7,18].  
78 Interestingly, the residue A173 in the  $\alpha 2$  region of MHC-I seems to be necessary but not  
79 enough to trigger virus entry [7,18,19].  
80 EHV-1 and EHV-4 are important pathogens that cause great suffering in *Equidae* and other  
81 mammals and result in huge economic losses to the equine industry [20]. Efforts have been  
82 made to find efficient vaccines against both viruses [21]. However, the protection is usually  
83 limited in time and efficacy; frequent outbreaks occur also in vaccinated horses [22–25].  
84 Here, we present crystal structures of free gD1 and gD4, which show a similar fold as other  
85 gD proteins from related viruses such as herpes simplex virus type 1 (HSV-1) (PDB-ID 2C36,  
86 [26], pseudorabies virus (PrV, PDB-ID 5X5V, 27), and bovine herpesvirus type 1 (BoHV-1,  
87 PDB-ID 6LS9, [27]). We further measured dissociation constants (in a micromolar range) for  
88 recombinant gD1/gD4 and C-terminally truncated gD4 binding to equine MHC-I by surface  
89 plasmon resonance spectroscopy (SPR). No increased binding affinity was observed for the  
90 truncated protein as was the case for gD of HSV-1, HSV-2, and PrV [28,29], suggesting a  
91 structurally different mode of binding during entry into host cells. Cell culture assays showed  
92 that recombinant gD1 and gD4 as well as truncated gD4 can inhibit viral replication *in vitro*,  
93 where again the truncated version did not perform better than the full-length protein. The  
94 crystal structures were further used for *in silico* docking analyses to equine MHC-I. Based on  
95 these docking positions, viral mutants with point mutations at position F213 or D261 were  
96 produced and displayed significant growth impairments which support the proposed mode of  
97 binding of gD1 and gD4 to MHC-I.

98

## 99 **Results**

## 100 **Crystal structure of unbound EHV-1 and EHV-4 gD**

101 Recombinant gD1 and gD4 lacking the transmembrane region were produced in insect cells,  
102 purified by affinity and size exclusion chromatography and used for crystallization  
103 experiments (Figure S 1 and Figure S 2). To evaluate the correct identity, sequence, and  
104 molecular mass of gD1, gD4, and equine MHC-I, mass spectrometry (MS) analysis was  
105 conducted. Recombinant equine MHC-I 3.1 (Eqca-1\*00101) including a peptide  
106 (SDYVKVSN) linked to the  $\beta$ 2-microglobulin ( $\beta$ 2m) region was produced in insect cells as  
107 well and purified in the same manner as gD1 and gD4.

108 To this point, molecular masses of gD1 and gD4 were determined only by SDS-PAGE and  
109 Western blotting. However, these techniques are known to often lead to an overestimation of the  
110 molecular mass [30]. Here we employed matrix-assisted laser desorption ionization-time of  
111 flight mass spectrometry (MALDI-TOF-MS) to analyze diluted recombinant protein. The  
112 proteins gD1, gD4 and the MHC-I  $\alpha$ -chain contain a Tobacco Etch Virus (TEV) cleavage  
113 site and a His<sub>6</sub>-tag (ENLYFQG-H<sub>6</sub>) which contribute approximately 1675 Da to the  
114 molecular weight of the molecules (calculated with [https://web.expasy.org/peptide\\_mass](https://web.expasy.org/peptide_mass)).  
115 Additionally, the residues EF (approximately 300 Da) originating from the *Eco*-RI restriction  
116 site, were detected by in-source-decay (ISD) in the recombinant proteins. A size of  
117 approximately 43078 Da for gD1, 43761 Da for gD4, 37779 Da for the  $\alpha$ -chain of MHC-I and  
118 13241 Da for  $\beta$ 2m with its linker and attached peptide was determined (Figure 1 A-C).

119 Excluding the molecular weight of the TEV cleavage site and the His<sub>6</sub>-tag (1675 Da), this  
120 translates into a molecular weight of 41403 and 42086 Da for soluble gD1 and gD4,  
121 respectively (Table 1) and implies an approximate molecular weight of 49345 Da for the  
122 recombinant MHC-I molecule consisting of  $\alpha$ -chain (36100 Da) and  $\beta$ 2m with linker and  
123 peptide (13240 Da), and 48500 Da without the linker.

124 The difference between predicted and observed molecular masses is due to post translational  
125 modifications (PTMs) such as glycosylations which contribute approximately 4000-5000 Da

126 (Table 1). Further analysis of recombinant gD1, gD4, and MHC-I by ISD and tandem mass  
127 spectrometry (MS/MS) of in-gel digested Coomassie-stained proteins confirmed protein  
128 identities and presence of the correct N- and C-termini of gD1 and gD4 and N-terminus of  
129 MHC-I  $\alpha$ -chain (Figure S 4 A, B, C).

130

131 A 2.45 Å resolution diffraction data set was collected for a gD1 crystal, and the gD1 structure  
132 (Figure 2 A) was determined using the structure coordinates of HSV-1 gD (protein data bank  
133 PDB-ID 2C36) for molecular replacement and refined to an  $R_{\text{work}}$  of 20.3% and  $R_{\text{free}}$  of 25.7%  
134 (Table 2, PDB-ID 6SQJ). The crystal structure of gD1 contains two gD molecules per  
135 asymmetric unit. In solution only the monomeric form was observed by size exclusion  
136 chromatography (SEC)-multi-angle static light scattering (MALS) (Figure S 5). Two ions  
137 interpreted as magnesium are trapped between the molecules and coordinated by residues  
138 E242 and D261 of both protein chains together with water molecules. The residues E32 to  
139 R38 and N281 to T348 could not be modeled due to a lack of electron density. N-linked  
140 glycosylations are visible at the predicted sites N20 and N28 [31] which are conserved  
141 between gD1 and gD4 but not in gDs of other alphaherpesviruses.

142 GlycoproteinD4 was crystallized with only one protein per asymmetric unit. The structure  
143 was determined at a resolution of 1.9 Å (Table 2, PDB-ID 6TM8, Figure 2 B) using the  
144 coordinates of gD1 structure for molecular replacement and refined to an  $R_{\text{work}}$  of 17.5% and  
145  $R_{\text{free}}$  of 21.5% (Table 2). In total 244 residues could be modeled (R34 to R277).

146 In the structures of gD1 and gD4, six cysteines were found to form three disulfide bonds at  
147 sites conserved in members of the gD polypeptide family: C87/C209, C126/C223, and  
148 C138/C147 [27,29,32]. The overall folds of gD1 and gD4 are very similar with a root-mean-  
149 square deviation (rmsd) of 0.7 Å for 220 common C $\alpha$  atoms (Figure 2 C). The cores consist of  
150 a nine-stranded (A', B, C, C', C'', D, E, F, and G)  $\beta$ -barrel, arranged in a typical V-like Ig  
151 fold, flanked by N- and C-terminal extensions with loops,  $\alpha$ -helices ( $\alpha$ 1,  $\alpha$ 2,  $\alpha$ 3', and  $\alpha$ 3), and

152 small  $\beta$ -strands (str2-4). The termini in both structures point in opposite directions (Figure 2)  
153 and the unresolved C-termini are predicted to be unstructured by FoldIndex  
154 (<https://fold.weizmann.ac.il/fldbin/findex>).

155  
156 Table 1: Predicted and measured molecular mass in Da of recombinant gD1, gD4 (aa 31-349),  
157 and equine MHC-I 3.1  $\alpha$  and  $\beta$ 2m region with the uncleaved TEV site and His<sub>6</sub>-tag.  
158 Theoretical masses were calculated using [https://web.expasy.org/peptide\\_mass/](https://web.expasy.org/peptide_mass/) and the actual  
159 mass determined by matrix-assisted laser desorption ionization-time of flight mass  
160 spectrometry (MALDI-TOF-MS). Post-translational modifications like glycosylations account  
161 for the discrepancies between the predictions and measurements. NA: not applicable.

| <b>Molecule</b>          | <b>predicted</b> | <b>measured</b> | <b>without<br/>TEV and His6</b> |
|--------------------------|------------------|-----------------|---------------------------------|
| gD1                      | 38216            | 43078           | 41403                           |
| gD4                      | 38252            | 43761           | 42086                           |
| MHC-I $\alpha$ 1-3       | 33399            | 37779           | 36104                           |
| $\beta$ 2m               |                  |                 |                                 |
| (+linker and<br>peptide) | 13243            | 13241           | NA                              |

162

Table 2: Crystallographic data collection and model refinement statistics.

|                        | <b>gD1</b>  | <b>gD4</b>  |
|------------------------|-------------|-------------|
| PDB-ID                 | <b>6SQJ</b> | <b>6TM8</b> |
| <b>Data collection</b> |             |             |
| Wavelength [Å]         | 1.0332      | 0.91841     |
| Temperature [K]        | 100         | 100         |



|                                                             |                                               |                                               |
|-------------------------------------------------------------|-----------------------------------------------|-----------------------------------------------|
| Space group                                                 | P2 <sub>1</sub> 2 <sub>1</sub> 2 <sub>1</sub> | P2 <sub>1</sub> 2 <sub>1</sub> 2 <sub>1</sub> |
| <b>Unit cell parameters</b>                                 |                                               |                                               |
| a, b, c [Å]                                                 | 71.9; 94.5; 101.3                             | 73.1; 59.6; 69.7                              |
| α=β=γ [°]                                                   | 90                                            | 90                                            |
| Resolution range [Å]                                        | 50.00 - 2.24 (2.38 - 2.24) <sup>a</sup>       | 50.00 - 1.90 (2.01 - 1.90)                    |
| Reflections <sup>a</sup>                                    | 218509 (33751) <sup>a</sup>                   | 138685 (10835)                                |
| Unique reflections <sup>a</sup>                             | 33402 (5140)                                  | 23671 (1810)                                  |
| Completeness [%] <sup>a</sup>                               | 99.1 (95.8)                                   | 95.6 (78.2)                                   |
| Multiplicity <sup>a</sup>                                   | 6.5 (6.6)                                     | 5.9 (3.5)                                     |
| <b>Data quality<sup>a</sup></b>                             |                                               |                                               |
| I/σ(I) <sup>a</sup>                                         | 11.71 (0.92)                                  | 8.96 (0.96)                                   |
| R <sub>meas</sub> [%] <sup>a</sup>                          | 13.5 (199)                                    | 17.4 (126.8)                                  |
| CC <sub>1/2</sub> <sup>a</sup>                              | 99.8 (58.6)                                   | 99.5 (40.9)                                   |
| Wilson B factor [Å <sup>2</sup> ]                           | 53.3                                          | 32                                            |
| <hr/> <b>Refinement gD1 gD4</b>                             |                                               |                                               |
| Resolution range [Å] <sup>a</sup>                           | 50.00 - 2.24 (2.33 - 2.24)                    | 50.00 - 1.90 (2.01 - 1.90)                    |
| Reflections <sup>a</sup>                                    | 33399 (3181)                                  | 23642 (1792)                                  |
| Test set (5%) <sup>a</sup>                                  | 1669 (159)                                    | 1182 (89)                                     |
| R <sub>work</sub> [%] <sup>a</sup>                          | 20.3 (33.8)                                   | 17.5 (30.0)                                   |
| R <sub>free</sub> [%] <sup>a</sup>                          | 25.7 (34.0)                                   | 21.5 (37.2)                                   |
| <hr/> <b>Contents of Asymmetric Unit</b>                    |                                               |                                               |
| Molecules, residues, atoms                                  | 2; 477; 4049                                  | 1; 244; 2037                                  |
| Mg <sup>2+</sup> , GlcNAc molecules, glycerol               | 2; 5; -                                       | -; -; 4                                       |
| Water molecules                                             | 132                                           | 174                                           |
| <b>Mean Temperature factors [Å<sup>2</sup>]<sup>b</sup></b> |                                               |                                               |

|                                          |       |       |
|------------------------------------------|-------|-------|
| All atoms                                | 58.7  | 31.1  |
| Macromolecules                           | 58    | 30.4  |
| Ligands                                  | 106.7 | 49.9  |
| Water oxygens                            | 53.5  | 36    |
| <hr/>                                    |       |       |
| <b>RMSD from target geometry</b>         |       |       |
| Bond length [Å]                          | 0.007 | 0.012 |
| Bond angles [°]                          | 0.84  | 1.04  |
| <b>Validation statistics<sup>c</sup></b> |       |       |
| <b>Ramachandran plot</b>                 |       |       |
| Residues in allowed regions [%]          | 2.8   | 2.5   |
| Residues in favored regions [%]          | 97.2  | 97.5  |
| MOLPROBITY clashscore <sup>d</sup>       | 3.23  | 3.9   |

163 <sup>a</sup> Data for the highest resolution shell in parenthesis

164 <sup>b</sup> Calculated with PHENIX [33]

165 <sup>c</sup> Calculated with MOLPROBITY [34]

166 <sup>d</sup> Clash score is the number of serious steric overlaps (> 0.4) per 1 000 atoms.

167

## 168 **Comparison of gD1, gD4, and homolog structures**

169 The amino acid sequence identity between EHV-1 and EHV-4 gDs is 76%, much higher than  
170 compared to HSV-1 (25%, GenBank AAK19597), PrV (34%, GenBank AEM64108) or  
171 BoHV-1 (31%, GenBank NP045370). While the global folds of gDs of these different viruses  
172 are very similar (Figure 3), the number and positions of  $\alpha$ -helices differ. Compared to EHV-1  
173 and EHV-4 gDs, there is an extra helix termed  $\alpha 1'$  present in PrV and BoHV-1 gDs. PrV gD  
174 has an exclusive  $\alpha 2'$  helix which cannot be observed in other gD structures elucidated so far.  
175 In HSV-1 and HSV-2 gDs, the  $\alpha 3'$  helix is missing but is present in EHV-1, EHV-4, PrV,  
176 and BoHV-1 gDs (Figure 3D). In HSV-1 and HSV-2 gDs, the  $\alpha 1$  helix is split and the  $\alpha 3$

177 helix is kinked in HSV-1 (Figure 3 D) which is not seen in the other known gD structures.  
178 The six disulfide bonds C87/C209, C126/C223, and C138/C147 are conserved across EHV-1,  
179 EHV-4, PrV, HSV-1, HSV-2, and BoHV-1 gDs, while the predicted and resolved  
180 glycosylation sites in the crystal structure of gD1 and gD4 are only conserved between EHV-1  
181 and EHV-4 (N52, N61, N297, N386) (Figure S 6). Between gD1 and gD4, also the  
182 magnesium-coordinating residues seen in the gD1 monomer-monomer interface are  
183 conserved.

184

### 185 **Soluble gD1 and gD4 engage recombinant MHC-I with similar** 186 **binding affinities**

187 gD-binding affinities of different alphaherpesviruses to their receptors are known to differ  
188 greatly. For example, PrV gD binds human nectin-1 in the nanomolar range [35]. HSV-1 gD  
189 interacts more weakly, in a micromolar range, with nectin-1 and herpesvirus entry mediator  
190 (HVEM) [26] similarly to BoHV-1 gD with nectin-1 [27] (Table 3). For HSV-1, HSV-2, and  
191 PrV gDs, it has been demonstrated that C-terminal truncation of the proteins increases the  
192 binding affinities up to 100-fold (Table 3).

193

194 To study the interaction of soluble gD1 and gD4 with recombinant equine MHC-I, a surface  
195 plasmon resonance (SPR) binding assay was conducted.  $\alpha$ -chains together with  $\beta$ 2m with  
196 linked peptide of equine MHC-I 3.1 were produced in insect cells and purified by IMAC and  
197 SEC (Figure S 1 and Figure S 2 D). Additionally, the receptor affinity of a C-terminally  
198 truncated EHV-4 gD, gD4<sub>36-280</sub>, was tested. The truncated protein was produced in the same  
199 manner as gD1 and gD4 originally with the goal to crystallize it because the flexible C-  
200 terminus was suspected to hinder crystallization of gD1 and gD4. However, shortly after the  
201 production of the truncated gD4<sub>36-280</sub>, crystal structures were obtained for both gD1 and gD4  
202 proteins. Therefore, for gD4<sub>36-280</sub> only receptor binding kinetics were determined instead of

203 crystallizing it. Another truncated version, gD<sub>45-276</sub>, could not be produced in insect cells,  
 204 suggesting that the protein failed to fold properly. Binding analyses for soluble gDs were  
 205 conducted by using a protein dilution series in a range of 0 to 13 950 nM.  
 206 Dissociation constants ( $K_d^{app}$ ) of  $4000 \pm 800$  nM and  $4400 \pm 1200$  nM were calculated for  
 207 gD1 and gD4, respectively (Figure 4 A and B). The truncated gD4 version, gD<sub>36-280</sub>, exhibited  
 208 a receptor binding affinity to MHC-I in the same order of magnitude ( $5300 \pm 1200$  nM;  
 209 Figure 4 C-E).  
 210

Table 3: Comparison of dissociation constants ( $K_d^{app}$ ) of alphaherpesviruses-gDs binding their respective receptors measured by SPR. SW = swine, BO = bovine, MHC-I = equine (Eqca-1\*00101), nectin-1/HVEM = human. The C-terminal truncation of proteins is displayed in brackets under 'gD origin'. The upper part of the table represents full-length proteins, the bottom part truncated proteins.

| <b>gD origin</b> | <b>Receptor</b> | <b><math>K_d</math> (nM)</b> | <b>Reference</b> |
|------------------|-----------------|------------------------------|------------------|
| EHV-1 (349)      | MHC-I           | $4000 \pm 800$               | This study       |
| EHV-4 (349)      | MHC-I           | $4400 \pm 1200$              | This study       |
| HSV-1 (306)      | HVEM            | $3200 \pm 600$               | [36]             |
| HSV-1 (306)      | HVEM            | 4000                         | [26]             |
| HSV-1 (306)      | nectin-1        | $2700 \pm 200$               | [37]             |
| HSV-1 (306)      | nectin-1        | 1800                         | [26]             |
| HSV-2 (306)      | HVEM            | 1500                         | [36]             |
| PrV (354)        | nectin-1        | $130 \pm 70$                 | [35]             |
| PrV (337)        | nectin-1        | 191                          | [29]             |
| PrV (337)        | SW-nectin-1     | 301                          | [29]             |
| BoHV-1 (301)     | nectin-1        | $879 \pm 101$                | [27]             |

|              |             |             |            |
|--------------|-------------|-------------|------------|
| BoHV-1 (301) | BO-nectin-1 | 341 ± 106   | [27]       |
| <hr/>        |             |             |            |
| EHV-4 (280)  | MHC-I       | 5300 ± 1200 | This study |
| HSV-1 (285)  | HVEM        | 37          | [38]       |
| HSV-1 (285)  | HVEM        | 110         | [26]       |
| HSV-1 (285)  | nectin-1    | 38          | [39]       |
| HSV-1 (285)  | nectin-1    | 70          | [26]       |
| HSV-1 (285)  | nectin-1    | 17.1        | [40]       |
| HSV-1 (285)  | nectin-1    | 12.5        | [28]       |
| HSV-2 (285)  | nectin-1    | 19.1        | [28]       |
| PrV (284)    | nectin-1    | 16.1        | [29]       |
| PrV (284)    | SW-nectin-1 | 18.4        | [29]       |
| BoHV-1 (274) | nectin-1    | 701 ± 68    | [27]       |
| BoHV-1 (274) | BO-nectin-1 | 489 ± 157   | [27]       |

211

## 212 **Recombinant gD1, gD4, gD436-280 can block cell surface MHC-I**

213 To test whether recombinant gD1 and gD4 can bind to cell surface MHC-I and subsequently  
214 inhibit virus entry, blocking assays were performed. Equine dermal (ED) cells were incubated  
215 with the recombinant proteins ranging from 0 to 150 µg/ml (0 - 3.5 µM) for one hour on ice  
216 and subsequently infected with either EHV-1 or EHV-4 at a multiplicity of infection (MOI) of  
217 0.1. Viruses expressing green fluorescent protein (GFP) [41,42] during early infection were  
218 used to monitor and analyze the infection levels by flow cytometry. A dose-dependent  
219 reduction of infection of up to 50% and 33% on average with 150 µg/ml protein was observed  
220 for gD1 and gD4, respectively (Figure 5 A and B).

221 Plaque reduction assays were performed by using a similar procedure. Here, 150 µg/ml of  
222 gD1, gD4, and gD4<sub>36-280</sub> were used and cells were infected with 100 plaque forming units

223 (PFU) of EHV-1 or EHV-4. In the presence of soluble gD1, plaque numbers were decreased  
224 on an average by 51% for EHV-1. For EHV-4, the infection was reduced by an average of  
225 32% after blocking the cells with soluble gD4 recombinant protein. gD4 was also able to  
226 block the entry of EHV-1 by 40%. Likewise, gD1 reduced EHV-4 infection by 29%. In  
227 general, gD1 proved to be more efficient in blocking both virus infections. The gD4 variant  
228 lacking the C-terminal membrane-proximal residues, gD4<sub>36-280</sub>, could inhibit EHV-4 infection  
229 more efficiently with an average of 46% and proved to be slightly more potent than the  
230 extracellular domain of gD4 (32%) (Figure 5 C).  
231 Taken together, all recombinant gDs compete with viral native proteins. A dose-dependent  
232 reduction of infection was observed for gD1 and gD4. Notably, both recombinant gDs are able  
233 to efficiently block the entry of EHV-1 and EHV-4.

## 234 **In silico modeling predicts gD1 and gD4 residues F213 and D261** 235 **as hot spots for MHC-I binding**

236 No structures are available for gD1 or gD4 in complex with MHC-I. Therefore, protein-  
237 protein docking experiments were performed. Based on data from EHV-1 and EHV-4  
238 mutational studies with diverse MHC-I genotypes it can be assumed that gD binds in close  
239 proximity to MHC-I A173 since genotypes with other residues at this position are highly  
240 resistant against infections [7,18]. Available crystal structures of equine MHC-I Eqca-  
241 N\*00602 (1.18.7–6) and Eqca-N\*00601 (10.18) [43] feature a glutamic acid and a threonine  
242 residue at position 173 in the  $\alpha 2$  chain, respectively, and are known not to support EHV-1  
243 and EHV-4 infection [7]. Additionally, they contain mouse instead of equine  $\beta 2m$ . Therefore,  
244 for *in silico* modeling of gD1 and gD4 binding MHC-I, a homology model of MHC-I  
245 genotype 3.1 was constructed to reproduce the experimental setup from the *in vitro* assays.  
246 The  $\alpha$ -chain template (PDB ID: 4ZUU [43]) and target sequences showed 85% identity and  
247 88% similarity allowing the development of a high confidence model. In the next step, we

248 built a homology model of equine  $\beta 2m$  to achieve a physiological MHC-I state. The  $\beta 2m$   
249 template (PDB ID: 4ZUU) and target sequences showed 63% identity and 82% similarity and  
250 were therefore also highly suitable for homology modeling. The final homology models of the  
251  $\alpha$ -chain and  $\beta 2m$  contained no Ramachandran outliers [44] (Figure S 7). The calculated  
252 backbone rmsd to the template amounted to 0.4 Å in each structure suggesting the correct  
253 global fold of the model. All positions (101-164 and 203-259 in MHC-I and 25-80 in  $\beta 2m$ )  
254 and geometries of disulfide bonds considered typical for MHC were correct, suggesting a high  
255 model quality. The final model structure was obtained after assembling both chains and  
256 relaxing the homology model with a molecular dynamics (MD) simulation and used directly  
257 for the gD docking.

258 As described in the Materials and Methods section (*in silico* modeling suggests low impact of  
259 MHC-I peptide on gD-MHC-I binding), we initially identified gD residue D261 as a plausible  
260 hot spot contacting R169 in a peptide-free MHC-I docking. In order to mimic the  
261 experimental setup in a more realistic way, we inserted the peptide SDYVKVSNI into the  
262 MHC-I homology model for docking. This nonapeptide binds in a cleft between  $\alpha 2$  and  $\alpha 3$   
263 helices of MHC-I and was used in the cell-based assays. Since the peptide conformation is  
264 strongly dependent on the peptide length [43], the peptide CTSEEMNAF from MHC-I  
265 1.18.7–6 (PDB-ID: 4ZUU) was used to build a plausible model. The modeled peptide  
266 SDYVKVSNI showed no steric clashes and exhibited reasonable bond geometries with a  
267 negligible deviation of backbone atom positions (calculated backbone rmsd of 0.8 Å to the  
268 template) (**Error! Reference source not found.**).

269 gD1 and gD4 were docked to the MHC-I homology model with the modeled peptide.  
270 Subsequently, a structure showing initially identified contacts between MHC-I R169 and gD  
271 D261 were searched. Since ionic interactions are considered important for long-range binding  
272 partner recognition [45], it was assumed that this contact should be present in the protein-  
273 protein-interaction (PPI). In total, five complexes for gD1 and 21 complexes for gD4,

274 respectively, were found to bind to MHC-I. All structures were visually inspected according  
275 to selection criteria outlined in Table 5 and one docking result was selected for each protein  
276 complex. The EHV-1 gD complex was one of the 3% best scored results and the EHV-4 gD  
277 complex was in the 11% top results suggesting that both docking solutions represent low-  
278 energy protein complexes. Both structures showed similar gD-MHC-I orientations (Figure 6  
279 A, C) and recurring comparable contacts over the trajectories of MD simulations (**Error!**  
280 **Reference source not found.**).

281 Two contacts frequently observed between gD1 and MHC-I were identified using PyContact  
282 [46]. The first hot spot residue is D261 surrounded by the assumed O-ring including residues  
283 F213 and W257 which are contacting MHC-I binding pocket residue R169. The second hot  
284 spot residue is F213 surrounded by the assumed O-ring including Y108 and N110 and  
285 contacting MHC-I binding pocket residue I166. Additionally, an extensive hydrogen bond  
286 network between residues R103 – E242 and E113 – R238 (Figure 6, B and D) was detected  
287 (MHC-I – gD residues, respectively). All contacts and their frequencies over the trajectory of  
288 MD simulations are summarized in **Error! Reference source not found.**

289 PPIs over the course of MD simulations revealed minor movements measured as backbone  
290 rmsd of maximal 3.5 Å and 6.5 Å (gD1 and gD4, respectively; **Error! Reference source not**  
291 **found.**C and D). Based on the optimized docking models, two gD variants were designed for  
292 experimental validation in the next step: F213A and D261N. Both residue exchanges are  
293 predicted to disrupt gD – MHC-I contacts and lead to inhibition of viral replication in a cell-  
294 based assay.

## 295 **Mutating F213A and D261N in EHV-1 and 4 gD leads to growth** 296 **defects**

297 The gD1/4-MHC-I binding hypotheses (Figure 6) were experimentally investigated by  
298 mutating the proposed key residues F213 to alanine and D261 to asparagine in EHV-1 and



299 EHV-4 gDs. Two-step Red-mediated mutagenesis [47] was performed on EHV-1 and EHV-4  
300 bacterial artificial chromosomes (BACs) and multi-step growth kinetics with plaque  
301 reduction assays were used for virus characterization.  
302 All mutant viruses were successfully reconstituted from mutated BACs and the modified gD gene  
303 sequences were confirmed by Sanger sequencing. EHV-1-gD<sub>F213A</sub> displayed a significant 2-  
304 log reduction in growth kinetics and low titers in cell supernatant compared to the parental  
305 virus. Reverting the mutation rescued virus growth in cell culture (Figure 7 B). Plaque sizes of  
306 wild type, mutant and revertant viruses were similar. The virus mutants EHV-1-gD<sub>D261N</sub>,  
307 EHV-4-gD<sub>D261N</sub> and EHV-4-gD<sub>F213A</sub> did not grow in cells to the extent where growth kinetics  
308 could be analyzed. However, reverting the residue exchange in EHV-1-gD<sub>D261N</sub> rescued virus  
309 growth (Figure 7 A). Taken together, the gD<sub>D261N</sub> and gD<sub>F213A</sub> variants lead to replication-  
310 deficient viruses in EHV-1 and EHV-4.

## 311 Discussion

312 Although details of cell entry of alphaherpesviruses can differ greatly between virus species,  
313 four common steps characterize the whole entry processes. First gB and/or gC attach in a  
314 relatively unspecific and reversible manner to cell surface heparan sulfate proteoglycans  
315 (HSPG) and chondroitin sulfate proteoglycans (CSPG) [48–50]. This charge-based interaction  
316 is stabilized by a stronger and specific receptor-ligand interaction [51] followed by a signaling  
317 cascade which is activated by gD and gH/gL [52]. The latter process leads ultimately to the  
318 fusion of the viral envelope with the cell membrane or in some cases to entry via endocytosis  
319 through gB [4,53], gD is the essential protein that, in case of EHV-1 and EHV-4, binds to  
320 equine MHC-I [5–7]. The mode of gD binding to MHC-I remains elusive, although the  
321 structural understanding of alphaherpesviral gDs binding to their putative receptors has been  
322 largely extended in the last years [26,27,29,32]. Here, we present crystal structures of EHV-1

323 and EHV-4 gDs and propose a binding model to equine MHC-I through the key residues F213  
324 and D261.

325 The crystal structures of EHV-1 and EHV-4 gDs revealed an IgV-like fold with large N- and  
326 C-termini wrapping around the core which is common for members of the gD polypeptide  
327 family. Despite high variability in sequence identities, the overall structure of alphaherpesviral  
328 gDs is conserved with only small variations in the loop regions and number of helices  
329 [26,27,29,32]. The gD termini have been shown to be important for the entry process in HSV-  
330 1 [26]. To allow receptor binding, the C-terminus needs to be displaced to free the N-terminal  
331 binding site. This could be a mechanism to prevent early onset of the fusion process before the  
332 ligand and receptor are in proximity. Subsequently, the displacement of the C-terminus allows  
333 the formation of an N-terminal hairpin loop that is crucial for HVEM binding, since  
334 exclusively gD N-terminal residues (7-15 and 24-32) interact with the receptor [26,32,54]. The  
335 displacement of the C-terminal tail is also needed for the complex formation with nectin-1 as  
336 the binding sites overlap with those of HVEM with additional C-terminal interactions  
337 (residues 35–38, 199–201, 214–217, 219–221, 223) [55]. The formation of an N-terminal loop  
338 is not involved in nectin-1 binding since the deletion of residues 7-32 had little impact on the  
339 interaction [56]. The N-terminus of gD1 and gD4 is, similarly to PrV gD, shorter than in  
340 HSV-1 gD, suggesting that HVEM cannot function as an entry receptor in these viruses. In  
341 fact, it has already been experimentally observed that HVEM is not used as entry receptors by  
342 PrV [29]. Similarly, we observed that EHV-1 also does not employ the equine HVEM  
343 homolog either [53]. In HSV-1, gD forms a dimer in the unbound state on the virus envelope  
344 [57]. This is thought to stabilize the C-terminus since viruses with a destabilized terminus  
345 could not efficiently enter cells. Although the ionic contact and high Complex Formation  
346 Significance Score of the here solved EHV-1 gD dimer interface suggest a similar function, no  
347 dimer was observed in SEC, SEC-MALS, and MS analysis. Therefore, we suppose that gD1  
348 has no dimeric form on the virus envelope.

349 In contrast to results from C-terminally truncated gD homologs, which display a dramatic  
350 increase in receptor affinity (Table 3), truncated gD<sub>36-280</sub> binds MHC-I similarly as the non -  
351 truncated version. The higher affinities in the truncated homologs are explained by a faster  
352 interaction with the receptors, since the C- terminus that blocks the binding site is not required  
353 to be displaced upon binding anymore [58]. That the C-terminal truncation had no significant  
354 effect on the receptor affinity of EHV-4 gD suggests that the mode of binding differs from  
355 other alphaherpesviruses. Taking into account that EHV-1 and EHV-4 bind to MHC-I instead  
356 of HVEM or nectin-1, a different binding mechanism would be assumed. In line with gD<sub>36-280</sub>,  
357 truncated BoHV-1 gD interaction with nectin-1 showed no increased receptor affinity [27]  
358 (Table 3). A conformational change in the loop region between the G-strand and  $\alpha$ 2 helix is  
359 needed for receptor binding [27] and might explain why the affinity of the truncated BoHV-1  
360 gD does not increase.

361 SPR analysis showed binding of recombinant gD1, gD4, and gD<sub>36-280</sub> to recombinant MHC-I  
362 with micromolar affinities. The  $K_d^{app}$  are higher than in gD homologs of HSV-1, HSV-2, and  
363 PrV binding nectin-1. However, HSV-1 gD binding to HVEM displays similar affinities  
364 (Table 3 upper part). Nevertheless, there are two limitations of the SPR analysis in this study.  
365 First, the MHC-I molecule Eqca-1\*00101 (3.1) used here allowed lower infection rates in a  
366 previous study than the molecule Eqca-16\*00101 (2.16) [7]. Due to construct design reasons,  
367 the gene 3.1 fitted the purpose of crystallography better, although, no crystal structure could  
368 be obtained. However, the 2.16 molecule should display higher receptor affinities than the one  
369 observed in this study. Second, the linker region (GGGSGGGSGGGS), inserted to tether the  
370 peptide in the MHC-I complex to the  $\beta$ 2m C-terminus, might interfere with gD receptor  
371 binding. Our attempt to model the linker to the MHC-I molecule that binds gD1 in the  
372 position hypothesized here support this hypothesis. Nevertheless, the results from blocking  
373 assays confirm that the receptor affinities of soluble gDs are unlikely to be in the nanomolar  
374 range. Furthermore, blocking assays revealed that gD1, gD4, and gD<sub>36-280</sub> can block cell

375 surface MHC-I and thus compete with native gD in the viral envelope. It could be  
376 demonstrated that gD1 can block EHV-4 infections and vice versa implying that the receptor  
377 interaction is very similar in both viruses. This finding is supported by the binding models  
378 presented here.

379 The finding in SPR analysis that the C-terminally truncated gD4 does not display an increased  
380 receptor affinity was confirmed in blocking assays, thus suggesting that the receptor-binding  
381 mode differs from HSV and PrV, which is not surprising as they enter through different  
382 receptors.

383 The proposed docking position of gD1 to MHC-I explains why MHC-I Eqca-16\*00101 (2.16)  
384 allows higher infection rates than Eqca-1\*00101 (3.1) [7]. The residue 103 in the 3.1  $\alpha$ 1 region  
385 is an arginine, which is more spacious than asparagine in 2.16, thus preventing a closer  
386 interaction with gD and leading to lower receptor binding affinities. A binding hypothesis with  
387 MHC-I 2.16 and a crystal structure of this molecule could confirm that theory. A173 of  
388 MHC-I has been shown previously to play a major role in the entry of EHV-1 and EHV-4 by  
389 two studies. First, the entry of EHV-1 into usually non-susceptible NIH3T3 cells transfected  
390 with altered hamster MHC-I Q173A has been shown together with the negative effect on  
391 infection rates of hydrophilic residues at position 173 in equine MHC-I [18]. Second, it has  
392 been demonstrated that not all equine MHC-I genes support entry of EHV-1 and 4 into equine  
393 MHC-I transfected mouse mastocytoma (P815) cells and that MHC-I genes harboring  
394 residues other than alanine at position 173 are highly resistant against EHV-1 and 4 infections  
395 [7]. The gD1/4-MHC-I binding hypotheses explain the role of MHC-I A173 well by showing  
396 that bulkier amino acids at that position lead to steric hindrance in the gD binding pocket.

397 This applies to MHC-I alleles 3.3 (V173), 3.4 (T173), 3.5 (E173), and 3.6 (V173), which do  
398 not support EHV-1 and 4 entry [7,18]. The model can even explain why the genotype Eqca-  
399 7\*00201 (3.7), although harboring an alanine at position 173, does not allow entry of EHV-1  
400 and 4 into P815 3.7 [7]. The glutamine residue at position 174 is assumed to hinder gD

401 binding sterically. The side-chain would point in the bound state into a hydrophobic residue-  
402 patch (W253, F256, W257) of gD, leading to an enthalpic penalty. Strangely, the inability of  
403 the viruses to enter via the MHC-I haplotype Eqca-2\*00101 (3.2) which harbors A173 and  
404 A174 cannot be explained by the binding model. The topology of this MHC-I molecule is  
405 predicted to be very similar to those allowing virus entry. A crystal structure of the 3.2 MHC-I  
406 gene might give an explanation. Mutations in the gD binding pocket R43, W253, F256, and  
407 W257 could prove useful for a more detailed evaluation of the predicted interaction with  
408 MHC-I A173.

409 Another observation by Sasaki et al. [18] was that the mutation W171L in equine MHC-I  
410 impairs virus entry into NIH3T3 cells transfected with this MHC-I. Although the cell surface  
411 expression of this mutant was reduced, this is still interesting since structural data show that  
412 W171 points towards the peptide in the binding groove and should therefore not be involved  
413 directly in binding gD. The tryptophan would be able to stabilize some peptides with hydrogen  
414 bonds, whereas a leucine would not. A leucine at position 171 could therefore lead to a  
415 more loosely bound peptide with a higher flexibility, resulting in an interference via the gD-  
416 MHC-I binding. This theory would suggest that the peptide in the MHC-I binding groove  
417 itself could play a role in the receptor-ligand interaction, which could be tested by using  
418 different peptides bound to MHC-I in blocking assays and by testing mutated equine MHC-I  
419 W171L in blocking assays with soluble recombinant gDs.

420 Considering all these results, the question arises whether EHV-1 and EHV-4 can facilitate entry  
421 through, so far, unknown non-equine MHC-I molecules. Sasaki et al. [18] demonstrated that  
422 mutated hamster MHC-I Q173A allowed low EHV-1 infection. Unfortunately, EHV-4 has not  
423 been tested in the same manner. A computational approach could be employed to search for non-  
424 equine MHC-I molecules that are similar in the binding region that is visible in the gD1/4-MHC-  
425 I binding model and be used to select promising targets for transfection/infection assays.  
426 Experimentally, EHV-1 and EHV-4 infections could be tested in cell lines from susceptible

427 species, e.g. bovine, rabbit, monkey, pig, cat, human [59,60], alpacas, lamas, polar bears [61],  
428 and rhinoceros [61–63] cell lines, with and without inhibited MHC-I expression by using  $\beta$ 2m  
429 knockdown as in Sasaki et al. [6].

430 Taken together, the proposed docking modes of gD1 and gD4 to MHC-I can explain several  
431 experimentally obtained results and are therefore plausible. Additionally, the docking models  
432 are supported by EHV-1 and EHV-4 viruses with mutated gD<sub>F213A</sub> and gD<sub>D261N</sub> that all  
433 exhibited an impaired growth. A limitation in this experiment was the difficulty of reverting  
434 EHV-4 mutations to original status to confirm that the observed effect was exclusively due to  
435 the gD<sub>F213A</sub> and gD<sub>D261N</sub> variants. Nevertheless, it could be shown that the gD residues F213  
436 and D261 play a key role during entry of EHV-1 and EHV-4 providing starting points for  
437 further mutational studies possibly leading to an efficient vaccine. The results presented here  
438 might also be used to generate gD-based EHV-1 and EHV-4 inhibitors for reduction of clinical  
439 symptoms in horses and non-definite hosts.

440

## 441 **Materials and Methods**

### 442 **Viruses**

443 EHV-1 strain RaCL11 and EHV-4 strain TH20p are maintained as bacterial artificial  
444 chromosome infections clones (BAC). The viruses have GFP under the control of the HCMV  
445 major immediate-early (IE) promoter inserted into the Mini-F sequence to easily recognize  
446 infected cells. Clones were generated as described previously in Rudolph et al. and Azab et al.  
447 [41,42,64]. The viruses were grown on equine dermal (ED) cells (CCLV-RIE 1222, Federal  
448 Research Institute for Animal Health, Greifswald, Germany) at 37 °C under a 5% CO<sub>2</sub>  
449 atmosphere.

450

### 451 **Cells**

452 ED cells were grown in Iscove's modified Dulbecco's medium (IMDM; Pan, Biotech,  
453 Aidenbach, Germany) containing 20% fetal bovine serum (FBS; Biochom GmbH, Berlin,  
454 Germany), 1 mM sodium pyruvate (Pan Biotech, Aidenbach, Germany), 1% nonessential  
455 amino acids (NEAA; Biochom GmbH, Berlin, Germany), and P-S solution (100 U/mL  
456 penicillin: Panreac, AppliChem GmbH, Darmstadt, Germany; 100 µg/mL streptomycin: Alfa  
457 Aesar, Thermo Fisher Scientific, Kandel, Germany (P-S) at 37°C under a 5% CO<sub>2</sub>  
458 atmosphere.

459 Human embryonic kidney (293T, ATCC CRL-11268) cells were propagated in Dulbecco's  
460 modified Eagle's medium (DMEM; Biochom GmbH, Berlin, Germany), supplemented with  
461 10% FBS and P-S. Sf9 cells (IPLB-Sf21-AE, Invitrogen, Germany) were propagated in serum  
462 free Sf-900 III medium (Gibco, Thermo Fisher Scientific, New York, USA) and High Five™  
463 cells (BTI-TN-5B1-4, Invitrogen, Germany) in serum free Express Five medium (Gibco,  
464 Thermo Fisher Scientific, New York, USA) at 27°C on orbital shaker.

465

## 466 **Construction of expression plasmids**

467 Constructs were amplified from insect cell codon-optimized DNA fragments (Bio Basic Inc.,  
468 Canada) for protein production in High Five insect cells. Synthetic truncated genes contained  
469 the gene of interest (gD1 residues 32-249, gD4 residues 32-249, equine MHC-I 3.1.), a C-  
470 terminal TEV protease cleavage site (ENLYFQG), and a hexa-histidine tag (His<sub>6</sub>), all flanked  
471 by *EcoRI*- and *ScaI*-restriction sites (Figure 8). Sequences of codon optimized genes can be  
472 found in the supplementary data. A further truncated form of gD4 containing the residues 36-  
473 280 was amplified from gD4 synthetic gene with the primer pair VK50/VK56 (**Error!**  
474 **Reference source not found.**).

475 The Autographa californica nuclear polyhedrosis virus (AcNPV) baculovirus gp64 signal  
476 sequence under control of the very late polyhedrin promoter was inserted into the insect cell  
477 vector plasmid pACEBac1 (Addgene, LGC Standards Teddington, UK) by using another

478 synthetic gene (VK18, LGC Genomics, Berlin, Germany) and the primer pairs VK7/VK7  
479 (**Error! Reference source not found.**). Subsequently, plasmids containing synthetic genes  
480 (gD1, gD4, MHC-I) were amplified in *Escherichia coli* (E. coli), purified, and digested with  
481 *EcoRI*- and *ScaI*-restriction enzymes for insertion into the transfer vectors which was digested  
482 with the same restriction enzymes. After ligation, these plasmids were transformed into  
483 DH10MultiBac electrocompetent cells and recombinant baculoviruses produced according to  
484 manufacturer's instructions (Bac-to-Bac expression system, Invitrogen). All constructs were  
485 verified by sequencing (VK8 or VK10/WA2, VK35/38; **Error! Reference source not**  
486 **found.**). Recombinant BACs were isolated and used for virus production in Sf9 cells as  
487 described in Santos et al. [65].

## 488 **Protein production and purification**

489 Equine MHC-I, gD1<sub>32-349</sub>, gD4<sub>32-349</sub>, and gD4<sub>36-280</sub> were expressed in HighFive cells. Cell  
490 supernatant was harvested after 72 h post infection by centrifugation. The pH was adjusted to  
491 7 with 1M tris(hydroxymethyl)aminomethan (Tris)-HCl buffer at pH 9 on ice and incubated  
492 for at least 1 h with washed Ni<sup>2+</sup>-NTA beads for affinity chromatography. Beads with bound  
493 recombinant protein were collected by a gravity flow column and the proteins were eluted  
494 with a buffer containing 20 mM Tris-HCl at pH 7.5 or 2-(N-morpholino)ethanesulfonic acid  
495 (MES) at pH 6 for gDs and MHC-I, respectively, and 200 mM NaCl, 5% glycerol, and 200  
496 mM imidazole. Concentrated protein was loaded onto a 16/600 Superdex 200 gel filtration  
497 column (GE Healthcare Piscataway, NJ). The buffer conditions were the same as in Ni<sup>2+</sup>-NTA  
498 affinity chromatography but with 20 mM NaCl and no imidazole. Proteins collected from  
499 size-exclusion chromatography were concentrated (Concentrators, Amicon Ultra, Millipore,  
500 Darmstadt, Germany), aliquoted and directly used for crystallization or stored at -80°C.

501



## 502 **Crystallization, structure determination, and refinement**

503 Crystals of EHV-1 gD were obtained by the sitting-drop vapor-diffusion method at 18°C with  
504 a reservoir solution composed of 0.1 M Tris/HCl buffer at pH 8.5, 0.2 M MgCl<sub>2</sub>, and 30%  
505 (w/v) polyethylene glycol (PEG) 4000. Crystals were cryo-protected with a solution  
506 composed of 75% mother liquor and 25% (v/v) glycerol and subsequently flash-cooled in  
507 liquid nitrogen. Synchrotron diffraction data were collected at the beamline P14 at DESY  
508 (Hamburg, Germany) and at the beamline 14-2 of the MX beamline of the BESSY II (Berlin,  
509 Germany) and processed with X-ray detector software (XDS) [66]. The structure was solved  
510 by molecular replacement with PHASER [67] using the coordinates of PDB-ID 2c36 as  
511 search model for gD1 which was then used as search model for gD4. A unique solution with  
512 two molecules in the asymmetric unit for gD1 and molecule for gD4 were subjected to the  
513 program AUTOBUILD in PHENIX [33] and manually adjusted in COOT [68]. The structures  
514 were refined by maximum-likelihood restrained refinement using PHENIX [33,69]. Model  
515 quality was evaluated with MolProbity [70] and the JCSG validation server [71]. Secondary  
516 structure elements were assigned with DSSP [72] and for displaying sequence alignments  
517 generated by ClustalOmega [73] ALSCRIPT [74] was used. Structure figures were prepared  
518 using PyMOL [75]. Coordinates and structure factors have been deposited in the PDB for gD1  
519 with PDB-ID 6SQJ as well as for gD4 with PDB-ID 6TM8. Diffraction images have been  
520 deposited at proteindiffraction.org (gD1: DOI 10.18430/m36sqj and gD4 DOI  
521 10.18430/m36tm8).

522

## 523 **Mass spectrometry analysis**

524 Intact protein mass of gD1, gD4, and MHC-I was determined by matrix-assisted laser  
525 desorption ionization-time of flight mass spectrometry (MALDI-TOF-MS) using an  
526 Ultraflex-II TOF/TOF instrument (Bruker Daltonics, Bremen, Germany) equipped with a  
527 200 Hz solidstate Smart beam™ laser. Samples were spotted using the dried-droplet

528 technique on sinapinic acid (SA) or 2,5-dihydroxybenzoic acid (DHB) matrix (saturated  
529 solution in 33% acetonitrile / 0,1% trifluoroacetic acid). The mass spectrometer was  
530 operated in the positive linear mode, and spectra were acquired over an m/z range of 3,000-  
531 60,000. Data was analyzed using FlexAnalysis 2.4. software provided with the instrument.  
532 Protein identity was determined by tandem mass spectrometry (MS/MS) of in-gel digested  
533 Coomassie stained protein with 12,5µg/ml Glu-C and trypsin, and 10µg/ml Asp-N in 25nm  
534 ammonium bicarbonate.  
535 N-terminal c and C-terminal (z+2) sequence ion series were generated by in-source decay  
536 (ISD) with 1,5-diaminonaphthalene (1,5-DAN) as matrix (20 mg/ml 1,5-DAN in 50%  
537 acetonitrile / 0,1% trifluoroacetic acid). Spectra were recorded in the positive reflector mode  
538 (RP PepMix) in the mass range 800–4,000.

### 539 **SEC-MALS analysis**

540 For molecular mass determination of soluble, recombinant gD1, SEC-MALS [76] was  
541 performed. Protein solution was run at room temperature on a Superdex 75 10/300 GL (GE  
542 Healthcare, Piscataway, NJ) column with 2 mg/ml gD1 and a mobile phase composed of Tris-  
543 HCl at pH 7.5, 200 mM NaCl, 5% glycerol, and 0.02% sodium azide, attached to a high-  
544 performance liquid chromatography (HPLC) system (Agilent Technologies, Santa Barbara,  
545 CA, USA) with a mini DAWN TREOS detector (Wyatt Technology Corp., Santa Barbara,  
546 CA, USA). Data was acquired and analyzed with the ASTRA for Windows software package  
547 (version 6.1.2).

548

### 549 **Surface plasmon resonance**

550 Binding kinetics of soluble gD1, gD4, and gD4<sub>36-280</sub> binding to amine-coupled recombinant,  
551 equine MHC-I 3.1 were measured at 25°C on a surface plasmon resonance (SPR) GE Biacore  
552 J Biomolecular Interaction Analyser instrument (Uppsala, Sweden) using a polycarboxylate

553 hydrogel sensor chip HC200M (XanTec bioanalytics GmbH). The second channel was coated  
554 with poly-L-lysine and positive nanogels (size 214nm) [77] that were shown to interact only  
555 weakly with gDs and used as negative control. The control sensorgrams were subtracted from  
556 reaction sensorgrams and normalized. The surfaces were regenerated with buffer containing  
557 200 mM NaCl and 10 mM NaOH after each cycle. Serial dilutions of gDs ranging from 0 to  
558 10000 nM were injected at medium flow and the interaction with MHC-I was monitored for  
559 15 min. The response curves of gDs binding to the MHC-I were fitted to the Hill-Wand  
560 binding model  $R_{eq} = \frac{R_{max}[A]^b}{K_b^b + [A]^b}$  [78] using Sigma plot 12.0 software.

561

## 562 **Generation and analysis of gD1/4-MHC-I binding model**

### 563 **Protein data**

564 Sequences of MHC-I and  $\beta$ 2m were obtained from UniProt-Databank [79]. The protein  
565 sequences with their respective UniProt IDs are listed in Table 4.

566

Table 4: Protein structures obtained from UniProt with their respective IDs.

| <b>Protein</b>              | <b>UniProt ID</b> |
|-----------------------------|-------------------|
| MHC-I gene Eqca-1*00101     | Q30483            |
| MHC-I genotype Eqca-N*00602 | Q860N6            |
| Horse $\beta$ 2m            | P30441            |
| Mouse $\beta$ 2m            | P01887            |

567

568

### 569 **Homology modeling**

570 Homology models were prepared using MOE (version 2018.0101; Molecular Operating

571 Environment, Chemical Computing Group ULC, Montreal, Canada). The models were  
572 constructed using GB/VI scoring [80] with a maximum of ten main chain models. To check  
573 geometry of obtained homology models, Ramachandran (phi-psi angle) plots [44] were  
574 calculated with MOE.

575 The full MHC-I gene 3.1 model was prepared based on the hybrid equine  $\alpha$ -chain - mouse  
576  $\beta$ 2m X-ray crystal structure with the best resolution (PDB-ID: 4ZUU [43]). The  $\alpha$ -chain and  
577  $\beta$ 2m homology models were superposed onto the template. All side chain clashes were  
578 removed by energy minimization using the OPLS-AA force field [81], resulting in the full  
579 MHC-I gene 3.1 model. The complete model was relaxed in a MD simulation on settings  
580 described below.

581

## 582 **Protein-Protein Docking**

583 MHC-I-gD1 complex were prepared with MOE 2018 by protonation [82], modeling of  
584 missing side chains, deleting water molecules and charging termini. Protein - protein docking  
585 was performed using Rosetta 3 suite (version 2018-33) [83,84]. The orientations of MHC-I  
586 and gD were randomized (flags -randomize 1 -randomize 2) and spun (flag -spin) to the  
587 beginning of the docking process. Docking perturbation parameters were set to default: 3 Å  
588 translational and 8° rotational movement (flag -dock\_pert 3 8) [85]. The residue side chains of  
589 both docking partners were allowed to rotate around the  $\chi$ 1 and the  $\chi$ 2 angles (flags -ex1 -  
590 ex2). In total 10 000 docking runs were conducted (flag -nstruct 10 000) as recommended by  
591 the Rosetta documentation [86], yielding over 7 000 poses in each docking round. A flat  
592 harmonic distance constraint between the C $\alpha$  of MHC-I A173 and the gD backbone was  
593 added based on reported genotype studies indicating the pivotal role of MHC-I A173 [7,18].  
594 This allowed us to limit the number of possible protein-protein docking complexes and  
595 perform local docking as recommended by the Rosetta documentation [86]. Constraint  
596 parameters were set to the default [86]: Distance 0 Å, standard deviation 1 Å and tolerance 5

597 Å to achieve the closest possible proximity between chains. In order to obtain a full MHC  
598 peptide complex, peptide SDYVKVSN<sub>I</sub>, as used in cell-based assays, was manually fitted  
599 into the MHC-I cleft. To fit our sequence, the peptide structure from the template (PDB-ID:  
600 4ZUU) containing a nonapeptide CTSEEMNAF was superposed on the MHC-I homology  
601 model. The co-crystallized nonapeptide sequence was manually mutated. The side chain  
602 conformations were adjusted using MOE's rotamer tool and energy minimized using the  
603 OPLS-AA force field to relax atomic clashes.  
604 Finally, gD1 and gD4 were docked into the prepared MHC-peptide complex. In order to find  
605 the final and most plausible docking pose of gD1 and gD4 in complex with MHC-I-peptide,  
606 an in-house developed MD Analysis-based (version 0.19.2) [87,88] script was used to find  
607 ionic key-contact defined as a distance of maximal 4.5 Å between C $\gamma$  atom of D261 in gD and  
608 C $\zeta$  atom of R169 in MHC-I. The script was run in a Python 3.6 environment [89].

609

### 610 **Filtering of Docking Poses and Classification of Residues Involved in the** 611 **Protein-Protein Interface**

612 In order to filter the most plausible from all best-scored docking poses, we applied three rules  
613 based on reported statistical evaluation of various protein-protein interactions (PPIs) [90,91]  
614 and biological function of Herpesvirus gD (Table 5) [40]. The residues involved in the  
615 protein-protein binding in the obtained binding hypotheses were classified according to the O-  
616 ring theory (Figure 6) [90].

617

Table 5: Criteria applied in our analysis of protein-protein interfaces to filter the most energetically favored docking poses.

| Filtering criterion                  | Rationale                                  |
|--------------------------------------|--------------------------------------------|
| Discarding docking poses with the C- | Orientation unlikely to be correct because |

|                                                                                           |                                                                                                                     |
|-------------------------------------------------------------------------------------------|---------------------------------------------------------------------------------------------------------------------|
| terminus participating in the resulting PPI                                               | the C-terminus merges with a transmembrane-helix anchoring in viral membrane [40]                                   |
| Discarding docking poses without lipophilic residues in the modeled PPI                   | Protein-protein interfaces with lipophilic contacts are common and entropically favored [91]                        |
| Accepting poses with contact to residues R, D, H, I, K, P, W, Y buried in interface areas | These residues are statistically enriched in protein-protein binding interfaces according to the O-ring theory [90] |

Table 6: Classification of residues applied in our analysis of protein-protein interface.

| <b>Residue type in the binding interface</b> | <b>Definition</b>                                                                                                                                                                    |
|----------------------------------------------|--------------------------------------------------------------------------------------------------------------------------------------------------------------------------------------|
| Hot spot residues                            | Amino acids statistically enriched in binding sites of protein - protein complexes and contributing more than 2 kcal/mol to the binding energy [90] or form lipophilic contacts [91] |
| O-ring                                       | Residues preventing solvation of binding hot spots [90]                                                                                                                              |

Binding pocket Counterpart of hot spot residues on the surface of the binding partner.

618

---

## 619 **Molecular Dynamics Simulations and Protein-Protein Interaction Analysis**

620 Molecular Dynamics (MD) simulations were prepared using Maestro (version 11.7;  
621 Schrödinger, New York, USA) and carried out using Desmond 2018-3 (version 5.5) [92]. All  
622 systems were simulated on water-cooled GeForce RTX 2080 Ti graphics processing units  
623 (NVIDIA Corporation, Santa Clara, USA). The full MHC-I gene 3.1 homology model was  
624 solvated in a cubic box with 12 Å buffering with SPC water model [93]. The system was  
625 neutralized using sodium or chloride ions and osmotic pressure was adjusted with 0.15 M  
626 sodium chloride to achieve an isotonic system. The subsequent system relaxation was  
627 performed according to the default Desmond protocol. The MD simulation ran under periodic  
628 boundary conditions and as an NPT ensemble (constant particle number, pressure and  
629 temperature) using the OPLS 2005 force field [94]. The MD simulation was performed in one  
630 replicate over 100 ns. Coordinates of the relaxed model were retrieved after the backbone  
631 rmsd (**Error! Reference source not found.**A) had reached a stable plateau around 3 Å  
632 indicating protein equilibration.

633 Docking poses were simulated under the same conditions as the homology models. The  
634 movement of protein - protein complex hypotheses was observed in a single MD simulation  
635 over 100 ns resulting in ca. 5000 complex conformations. MD simulations of the final  
636 selected docking pose were performed in triplicates. The simulated systems contained around  
637 140 000 – 168 500 atoms. The proteins were wrapped, aligned on the backbone and visually  
638 inspected in VMD [95] (version 1.9.3). Protein-protein interactions were analyzed using  
639 PyContact [46] (version 1.0.1) on default settings (distance cutoff 5.0 Å, angle cutoff 120.0°  
640 and distance cutoff between hydrogen and hydrogen bond acceptor of 2.5 Å). The PyContact

641 analysis was run in a Python 2.7 environment [89].

642

### 643 ***In silico* modeling suggests low impact of MHC-I peptide on gD-MHC-I** 644 **binding**

645 To test whether additional bias emerging from peptide modeling influenced docking  
646 experiments, two docking rounds were performed. First, gD1 was docked to peptide-free  
647 MHC-I. Second, gD1 was docked to MHC-I 3.1 homology model containing the peptide  
648 SDYVKVSN1 to check if docking provides comparable PPIs. Both docking rounds were  
649 performed using the settings described above. As the initial filtering step, the ten highest  
650 scored docking poses with the lowest Rosetta Energy were selected [96]. For further filtering,  
651 the rules described in the Methods section were applied (Table 5). Four out of ten docking  
652 poses fulfilled all three rules. Subsequently, single MD simulations for each docking pose  
653 were performed to examine PPI stability. For all protein - protein complexes the backbone  
654 rmsd was calculated to obtain an overview of the amplitude of protein movements. Only one  
655 docking pose showed a nearly constant backbone rmsd value of 6 Å indicating low complex  
656 movement (**Error! Reference source not found. B**). In order to characterize the obtained  
657 PPI, we applied selection criteria and identified three residue patch-classes in the binding  
658 surface as described in the Methods section (Figure 6). An inspection of the PPI over an MD  
659 simulation trajectory with PyContact [46] (**Error! Reference source not found.**) revealed  
660 two gD hot spot residues: D261 (surrounded by assumed gD O-ring T161, F213, and W257  
661 and contacting binding pocket MHC-I residue R169 over whole simulation time) and W257  
662 (surrounded by assumed O-ring R43, T161, and F213 and contacting binding pocket MHC-I  
663 residue I166 over the whole trajectory). It can be concluded that PPIs of peptide-free and  
664 peptide-bound docking poses are formed with similar residue patches (**Error! Reference**  
665 **source not found., Error! Reference source not found.**) suggesting that the presence of the  
666 peptide in MHC-I does not influence gD binding. The key residue F213 is involved in both



667 PPIs indicating its importance. We observed that peptide-bound docking poses exploit larger  
668 PPIs with more possible interactions than the peptide-free docking pose. We assume that  
669 more contacts between gD and MHC-I are favorable for the binding. Therefore, peptide-  
670 bound docking poses were chosen as the final ones.

671

## 672 **BAC mutagenesis**

673 The point mutations F213A and D261N in EHV-1 and EHV-4 gDs were introduced via a two-  
674 step Red recombination [47]. In brief, polymerase chain reaction (PCR) primers (**Error!**  
675 **Reference source not found.**) were designed in a way that the 50 nucleotide recombination  
676 arms include the point mutation and sequence to amplify the *kan<sup>R</sup>* gene. For construction of  
677 EHV-1-gD<sub>D261N</sub>, EHV-1-gD<sub>F213A</sub>, EHV-4-gD<sub>D261N</sub>, and EHV-4-gD<sub>F213A</sub> the primer pairs  
678 VK61/VK62, VK63/VK64, VK65/VK66, and VK67/VK68 were used for PCR amplification  
679 respectively. After Dpn-1 digest of PCR products, fragments were electroporated into GS1783  
680 containing EHV-1 or EHV-4 BACs. DNA from Kanamycin resistant colonies was extracted  
681 and correct mutants were selected based on Restriction fragment length polymorphism  
682 (RFLP) using the restriction enzyme Pst-I. Correct clones were subjected to another round of  
683 Red recombination to remove the *kan<sup>R</sup>* gene. Final clones were further analyzed by RFLP and  
684 sequencing, BAC extracted, purified and transfected into 293T cells. Cells and supernatant  
685 were harvested three days post transfection and used to infect ED cells. Revertants were  
686 produced from mutant clones using the same procedure with primer pairs VK69/VK70,  
687 VK71/VK72, VK73/VK74, and VK75/VK76 for producing EHV-1R-gD<sub>D261N</sub>, EHV-1R-  
688 gD<sub>F213A</sub>, EHV-4R-gD<sub>D261N</sub>, and EHV-4R-gD<sub>F213A</sub>, respectively. All genotypes were confirmed  
689 by PCR, RFLP, and Sanger sequencing using the primer pair WA2/VK8 and WA2/VK10  
690 (**Error! Reference source not found.**) for EHV-1 and EHV-4 mutants, respectively.

691

## 692 **Western blotting**

693 Western blot analysis was performed with soluble proteins: 50 µg/ml MHC-I, 5 µg/ml gD1,  
694 and 5 µg/ml gD4. Proteins were separated by 12% SDS-PAGE, transferred to a  
695 polyvinylidene difluoride (PVDF) membrane (Roth, Karlsruhe, Germany), detected with 1:1  
696 000 dilution rabbit anti-His<sub>6</sub> (Sigma-Aldrich, St Louis, USA) antibody and 1:10 000 dilution  
697 goat anti-rabbit-HRP antibody (Sigma-Aldrich, St Louis, USA) and visualized by enhanced  
698 chemiluminescence (ECL Plus; Amersham).

699

## 700 **Virus blocking assays**

701 To block cell surface MHC-I,  $1,5 \times 10^5$  ED cells were seeded in 24-well plates. In the next day,  
702 cells were incubated with 20, 50, 100 or 150 µg/ml recombinant gD1, gD4 or gD4<sub>36-280</sub> for 1 h  
703 on ice. Subsequently cells were infected with either EHV-1 or EHV-4 at MOI=0.1 and  
704 incubated for 1 h at 37°C. To remove un-penetrated viruses, cells were washed with citrate  
705 buffer, pH 3, containing 40 mM citric acid, 10 mM potassium chloride and 135 mM sodium  
706 chloride, then washed twice with phosphate buffered saline (PBS) and infection allowed to  
707 proceed for 24 h (EHV-1) or 48 h (EHV-4). For measurement of fluorescence intensity 10  
708 000 cells were analyzed with a FACSCalibur flow cytometer (BD Biosciences) and the  
709 software CytExpert (Beckman Coulter, Krefeld). The experiment was repeated three  
710 independent times for each protein.

711 For plaque reduction assay the same protocol was applied for blocking surface MHC-I with  
712 minor changes. Cells were initially incubated with 150 µg/ml gD1 or gD4, infected with 100  
713 PFU, and overlaid with 1.5% methylcellulose (Sigma-Aldrich, Taufkirchen, Germany) in  
714 Iscove's Modified Dulbecco's Medium (IMDM) after citrate treatment and washes with PBS.  
715 GFP plaques were counted after 48 h with a Zeiss Axiovert.A1 fluorescent microscope (Carl  
716 Zeiss AG, Jena, Germany). The experiment was repeated three independent times for each  
717 protein.

718

## 719 **Virus growth kinetics**

720 Virus replication was tested using multi-step growth kinetics and plaque areas were obtained  
721 as described before [50]. ED cells were grown to confluency in 24-well plates, infected with  
722 an MOI of 0.1 virus and incubated for 1 h at 37°C. Viruses on the cell surface were removed  
723 by washing with citrate buffer. After neutralization with IMDM, cells were washed twice with  
724 PBS and finally overlaid with 500 µl IMDM. At indicated times after the citrate treatment  
725 cells and supernatant were collected separately for EHV-1 and together for EHV-4 and stored  
726 at -80°C. Titers were determined by plating dilution series onto ED cells and counting plaque  
727 numbers after two days under a methylcellulose overlay. All plates were fixed for 10 min with  
728 4% paraformaldehyde, washed with PBS and stained for 10 min with 0.1% crystal violet  
729 solution in PBS which was washed away with tap water. Viral titers are expressed as PFU per  
730 milliliter from three independent and blinded experiments.

731

## 732 **Statistical analysis**

733 For blocking assays, plaque numbers were normalized to infection levels without recombinant  
734 proteins. Statistical analysis was done using GraphPad Prism 5 software (San Diego, CA,  
735 USA) and one-way ANOVA Bonferroni's multiple comparison test, \* indicates  $P \leq 0.05$ , \*\*  
736 indicates  $P \leq 0.01$ , \*\*\* indicates  $P \leq 0.001$ . Statistical analysis was done using an unpaired, one-  
737 tailed test.  $P < 0.05$  was considered significant.

## 738 **Acknowledgments**

739 We acknowledge DESY (Hamburg, Germany), a member of the Helmholtz Association HGF,  
740 for the provision of experimental facilities. Diffraction data were collected at beamline P11 of  
741 the PETRA III storage ring (Hamburg, Germany) under proposal I-20180662, assisted by Eva  
742 Crosas, and at the beamlines of the BESSY II storage ring (Berlin, Germany) via the Joint  
743 Berlin MX-Laboratory sponsored by Helmholtz Zentrum Berlin für Materialien und Energie,

744 Freie Universität Berlin, Humboldt-Universität zu Berlin, Max-Delbrück-Centrum für  
745 Molekulare Medizin, Leibniz-Forschungsinstitut für Molekulare Pharmakologie, Charité -  
746 Universitätmedizin Berlin and Max-Planck-Institut für Kolloid- und Grenzflächenforschung.  
747 We acknowledge David Machalz for providing us the MDAnalysis script allowing us fast  
748 docking poses analysis and Jong-Heng Huang for performing MALS experiments. For mass  
749 spectrometry (C.W.), we would like to acknowledge the assistance of the Core Facility  
750 BioSupraMol.

751

## 752 **References**

- 753 [1] Osterrieder N, Van de Walle GR. Pathogenic potential of equine alphaherpesviruses: the  
754 importance of the mononuclear cell compartment in disease outcome. *Veterinary*  
755 *Microbiology* 2010;143:21–8.
- 756 [2] Cole NL, Grose C. Membrane fusion mediated by herpesvirus glycoproteins: the  
757 paradigm of varicella-zoster virus. *Reviews in Medical Virology* 2003;13:207–22.
- 758 [3] Frampton AR, Stolz DB, Uchida H, Goins WF, Cohen JB, Glorioso JC. Equine  
759 herpesvirus 1 enters cells by two different pathways, and infection requires the activation  
760 of the cellular kinase ROCK1. *Journal of Virology* 2007;81:10879–89.
- 761 [4] Azab W, Gramatica A, Herrmann A, Osterrieder N. Binding of alphaherpesvirus  
762 glycoprotein H to surface  $\alpha 4\beta 1$ -integrins activates calcium-signaling pathways and  
763 induces phosphatidylserine exposure on the plasma membrane. *MBio* 2015;6:e01552-15.
- 764 [5] Kurtz BM, Singletary LB, Kelly SD, Frampton AR. *Equus caballus major*  
765 *histocompatibility complex class I* is an entry receptor for equine herpesvirus type 1.  
766 *Journal of Virology* 2010;84:9027–34.
- 767 [6] Sasaki M, Hasebe R, Makino Y, Suzuki T, Fukushi H, Okamoto M, et al. Equine major  
768 *histocompatibility complex class I* molecules act as entry receptors that bind to equine

- 769 herpesvirus-1 glycoprotein D. *Genes to Cells* 2011;16:343–57.
- 770 [7] Azab W, Harman R, Miller D, Tallmadge R, Frampton Jr AR, Antczak DF, et al. Equid  
771 herpesvirus type 4 uses a restricted set of equine major histocompatibility complex class  
772 I proteins as entry receptors. *J Gen Virol* 2014;95:1554–63.
- 773 [8] Triantafilou K, Fradelizi D, Wilson K, Triantafilou M. GRP78, a coreceptor for  
774 coxsackievirus A9, interacts with major histocompatibility complex class I molecules  
775 which mediate virus internalization. *Journal of Virology* 2002;76:633–43.
- 776 [9] Atwood WJ, Norkin LC. Class I major histocompatibility proteins as cell surface  
777 receptors for simian virus 40. *Journal of Virology* 1989;63:4474–7.
- 778 [10] Norkin LC. Simian virus 40 infection via MHC class I molecules and caveolae.  
779 *Immunological Reviews* 1999;168:13–22.
- 780 [11] Hong SS, Karayan L, Tournier J, Curiel DT, Boulanger PA. Adenovirus type 5 fiber  
781 knob binds to MHC class I  $\alpha 2$  domain at the surface of human epithelial and B  
782 lymphoblastoid cells. *The EMBO Journal* 1997;16:2294–306.
- 783 [12] Mullen MM, Haan KM, Longnecker R, Jardetzky TS. Structure of the Epstein-Barr virus  
784 gp42 protein bound to the MHC class II receptor HLA-DR1. *Molecular Cell*  
785 2002;9:375–85.
- 786 [13] David-Watine B, Israël A, Kourilsky P. The regulation and expression of MHC class I  
787 genes. *Immunology Today* 1990;11:286–92.
- 788 [14] Tallmadge RL, Campbell JA, Miller DC, Antczak DF. Analysis of MHC class I genes  
789 across horse MHC haplotypes. *Immunogenetics* 2010;62:159–72.
- 790 [15] Gilcrease MZ. Integrin signaling in epithelial cells. *Cancer Letters* 2007;247:1–25.
- 791 [16] Bjorkman PJ, Parham P. Structure, function, and diversity of class I major  
792 histocompatibility complex molecules. *Annual Review of Biochemistry* 1990;59:253–  
793 88.
- 794 [17] Germain RN, Margulies DH. The biochemistry and cell biology of antigen processing

- 795 and presentation. *Annual Review of Immunology* 1993;11:403–50.
- 796 [18] Sasaki M, Kim E, Igarashi M, Ito K, Hasebe R, Fukushi H, et al. Single amino acid  
797 residue in the A2 domain of major histocompatibility complex class I is involved in the  
798 efficiency of equine herpesvirus-1 entry. *Journal of Biological Chemistry*  
799 2011;286:39370–8.
- 800 [19] Ellis S, Martin A, Holmes E, Morrison W. At least four MHC class I genes are  
801 transcribed in the horse: phylogenetic analysis suggests an unusual evolutionary history  
802 for the MHC in this species. *International Journal of Immunogenetics* 1995;22:249–60.
- 803 [20] Patel J, Heldens J. Equine herpesviruses 1 (EHV-1) and 4 (EHV-4)—epidemiology,  
804 disease and immunoprophylaxis: a brief review. *The Veterinary Journal* 2005;170:14–  
805 23.
- 806 [21] Kydd JH, Townsend HG, Hannant D. The equine immune response to equine  
807 herpesvirus-1: the virus and its vaccines. *Veterinary Immunology and Immunopathology*  
808 2006;111:15–30.
- 809 [22] Allen G. Molecular epizootiology, pathogenesis, and prophylaxis of equine herpesvirus-  
810 1 infections. *Prog Vet Microbiol Immunol* 1986;2:78–144.
- 811 [23] Burrows R, Goodridge D. In vivo and in vitro studies of equine rhinopneumonitis virus  
812 strains. *Equine Infectious Diseases*, Karger Publishers; 1974, p. 306–21.
- 813 [24] Goehring L, Wagner B, Bigbie R, Hussey S, Rao S, Morley P, et al. Control of EHV-1  
814 viremia and nasal shedding by commercial vaccines. *Vaccine* 2010;28:5203–11.
- 815 [25] Goodman LB, Wimer C, Dubovi EJ, Gold C, Wagner B. Immunological correlates of  
816 vaccination and infection for equine herpesvirus 1. *Clin Vaccine Immunol* 2012;19:235–  
817 41.
- 818 [26] Krummenacher C, Supekar VM, Whitbeck JC, Lazear E, Connolly SA, Eisenberg RJ, et  
819 al. Structure of unliganded HSV gD reveals a mechanism for receptor-mediated  
820 activation of virus entry. *The EMBO Journal* 2005;24:4144–53.

- 821 [27] Yue D, Chen Z, Yang F, Ye F, Lin S, He B, et al. Crystal structure of bovine herpesvirus  
822 1 glycoprotein D bound to nectin-1 reveals the basis for its low-affinity binding to the  
823 receptor. *Science Advances* 2020;6:5147.
- 824 [28] Lu G, Zhang N, Qi J, Li Y, Chen Z, Zheng C, et al. Crystal structure of herpes simplex  
825 virus 2 gD bound to nectin-1 reveals a conserved mode of receptor recognition. *Journal*  
826 *of Virology* 2014;88:13678–88.
- 827 [29] Li A, Lu G, Qi J, Wu L, Tian K, Luo T, et al. Structural basis of nectin-1 recognition by  
828 pseudorabies virus glycoprotein D. *PLoS Pathogens* 2017;13:e1006314.
- 829 [30] Matsumoto H, Haniu H, Komori N. Determination of protein molecular weights on  
830 SDS-PAGE. *Electrophoretic Separation of Proteins*, Springer; 2019, p. 101–5.
- 831 [31] Flowers CC, Eastman EM, O’Callaghan DJ. Sequence analysis of a glycoprotein D gene  
832 homolog within the unique short segment of the EHV-1 genome. *Virology*  
833 1991;180:175–84.
- 834 [32] Carfi A, Willis SH, Whitbeck JC, Krummenacher C, Cohen GH, Eisenberg RJ, et al.  
835 Herpes simplex virus glycoprotein D bound to the human receptor HveA. *Molecular Cell*  
836 2001;8:169–79.
- 837 [33] Adams PD, Afonine PV, Bunkóczi G, Chen VB, Davis IW, Echols N, et al. PHENIX: a  
838 comprehensive Python-based system for macromolecular structure solution. *Acta*  
839 *Crystallographica Section D: Biological Crystallography* 2010;66:213–21.
- 840 [34] Chen VB, Arendall WB, Headd JJ, Keedy DA, Immormino RM, Kapral GJ, et al.  
841 MolProbity: all-atom structure validation for macromolecular crystallography. *Acta*  
842 *Crystallographica Section D: Biological Crystallography* 2010;66:12–21.
- 843 [35] Connolly SA, Whitbeck JC, Rux AH, Krummenacher C, Cohen GH, Eisenberg RJ, et al.  
844 Glycoprotein D homologs in herpes simplex virus type 1, pseudorabies virus, and bovine  
845 herpes virus type 1 bind directly to human HveC (nectin-1) with different affinities.  
846 *Virology* 2001;280:7–18.

- 847 [36] Willis SH, Rux AH, Peng C, Whitbeck JC, Nicola AV, Lou H, et al. Examination of the  
848 kinetics of herpes simplex virus glycoprotein D binding to the herpesvirus entry  
849 mediator, using surface plasmon resonance. *Journal of Virology* 1998;72:5937–47.
- 850 [37] Whitbeck JC, Muggeridge MI, Rux AH, Hou W, Krummenacher C, Lou H, et al. The  
851 major neutralizing antigenic site on herpes simplex virus glycoprotein D overlaps a  
852 receptor-binding domain. *Journal of Virology* 1999;73:9879–90.
- 853 [38] Rux AH, Willis SH, Nicola AV, Hou W, Peng C, Lou H, et al. Functional region IV of  
854 glycoprotein D from herpes simplex virus modulates glycoprotein binding to the  
855 herpesvirus entry mediator. *Journal of Virology* 1998;72:7091–8.
- 856 [39] Krummenacher C, Rux AH, Whitbeck JC, Ponce-de-Leon M, Lou H, Baribaud I, et al.  
857 The first immunoglobulin-like domain of HveC is sufficient to bind herpes simplex virus  
858 gD with full affinity, while the third domain is involved in oligomerization of HveC.  
859 *Journal of Virology* 1999;73:8127–37.
- 860 [40] Zhang N, Yan J, Lu G, Guo Z, Fan Z, Wang J, et al. Binding of herpes simplex virus  
861 glycoprotein D to nectin-1 exploits host cell adhesion. *Nature Communications*  
862 2011;2:577.
- 863 [41] Rudolph J, O'CALLAGHAN D, Osterrieder N. Cloning of the genomes of equine  
864 herpesvirus type 1 (EHV-1) strains KyA and RacL11 as bacterial artificial chromosomes  
865 (BAC). *Journal of Veterinary Medicine, Series B* 2002;49:31–6.
- 866 [42] Azab W, Kato K, Arai J, Tsujimura K, Yamane D, Tohya Y, et al. Cloning of the  
867 genome of equine herpesvirus 4 strain TH20p as an infectious bacterial artificial  
868 chromosome. *Archives of Virology* 2009;154:833–42.
- 869 [43] Yao S, Liu J, Qi J, Chen R, Zhang N, Liu Y, et al. Structural illumination of equine  
870 MHC class I molecules highlights unconventional epitope presentation manner that is  
871 evolved in equine leukocyte antigen alleles. *The Journal of Immunology*  
872 2016;196:1943–54.



- 873 [44] Ramachandran GN. Stereochemistry of polypeptide chain configurations. *J Mol Biol*  
874 1963;7:95–9.
- 875 [45] Honig B, Nicholls A. Classical electrostatics in biology and chemistry. *Science*  
876 1995;268:1144–9.
- 877 [46] Scheurer M, Rodenkirch P, Siggel M, Bernardi RC, Schulten K, Tajkhorshid E, et al.  
878 PyContact: Rapid, customizable, and visual analysis of noncovalent interactions in MD  
879 simulations. *Biophysical Journal* 2018;114:577–83.
- 880 [47] Tischer KB, von Einem J, Kaufer B, Osterrieder N. Two-step red-mediated  
881 recombination for versatile high-efficiency markerless DNA manipulation in *Escherichia*  
882 *coli*. *Biotechniques* 2006;40:191–7.
- 883 [48] Osterrieder N. Construction and characterization of an equine herpesvirus 1 glycoprotein  
884 C negative mutant. *Virus Research* 1999;59:165–77.
- 885 [49] Spear PG, Longnecker R. Herpesvirus entry: an update. *Journal of Virology*  
886 2003;77:10179–85.
- 887 [50] Azab W, Tsujimura K, Maeda K, Kobayashi K, Mohamed YM, Kato K, et al.  
888 Glycoprotein C of equine herpesvirus 4 plays a role in viral binding to cell surface  
889 heparan sulfate. *Virus Research* 2010;151:1–9.
- 890 [51] Csellner H, Walker C, Wellington J, McLure L, Love D, Whalley J. EHV-1 glycoprotein  
891 D (EHV-1 gD) is required for virus entry and cell-cell fusion, and an EHV-1 gD deletion  
892 mutant induces a protective immune response in mice. *Archives of Virology*  
893 2000;145:2371–85.
- 894 [52] Azab W, Zajic L, Osterrieder N. The role of glycoprotein H of equine herpesviruses 1  
895 and 4 (EHV-1 and EHV-4) in cellular host range and integrin binding. *Veterinary*  
896 *Research* 2012;43:61.
- 897 [53] Azab W, Osterrieder K. Initial contact: the first steps in herpesvirus entry. *Cell Biology*  
898 *of Herpes Viruses*, Springer; 2017, p. 1–27.

- 899 [54] Lazear E, Carfi A, Whitbeck JC, Cairns TM, Krummenacher C, Cohen GH, et al.  
900 Engineered disulfide bonds in herpes simplex virus type 1 gD separate receptor binding  
901 from fusion initiation and viral entry. *Journal of Virology* 2008;82:700–9.
- 902 [55] Di Giovine P, Settembre EC, Bhargava AK, Luftig MA, Lou H, Cohen GH, et al.  
903 Structure of herpes simplex virus glycoprotein D bound to the human receptor nectin-1.  
904 *PLoS Pathogens* 2011;7:e1002277.
- 905 [56] Manoj S, Jogger CR, Myscofski D, Yoon M, Spear PG. Mutations in herpes simplex  
906 virus glycoprotein D that prevent cell entry via nectins and alter cell tropism.  
907 *Proceedings of the National Academy of Sciences* 2004;101:12414–21.
- 908 [57] Handler CG, Cohen GH, Eisenberg RJ. Cross-linking of glycoprotein oligomers during  
909 herpes simplex virus type 1 entry. *Journal of Virology* 1996;70:6076–82.
- 910 [58] Krummenacher C, Carfi A, Eisenberg RJ, Cohen GH. Entry of herpesviruses into cells:  
911 the enigma variations. *Viral entry into host cells*, Springer; 2013, p. 178–95.
- 912 [59] Studdert M, Blackney M. Equine herpesviruses: on the differentiation of respiratory  
913 from foetal strains of type 1. *Australian Veterinary Journal* 1979;55:488–92.
- 914 [60] Ahn BC, Zhang Y, O’Callaghan DJ. The equine herpesvirus-1 (EHV-1) IR3 transcript  
915 downregulates expression of the IE gene and the absence of IR3 gene expression alters  
916 EHV-1 biological properties and virulence. *Virology* 2010;402:327–37.
- 917 [61] Greenwood AD, Tsangaras K, Ho SY, Szentiks CA, Nikolin VM, Ma G, et al. A  
918 potentially fatal mix of herpes in zoos. *Current Biology* 2012;22:1727–31.
- 919 [62] Abdelgawad A, Hermes R, Damiani A, Lamglait B, Czirják GÁ, East M, et al.  
920 Comprehensive serology based on a peptide ELISA to assess the prevalence of closely  
921 related equine herpesviruses in zoo and wild animals. *PLoS One* 2015;10:e0138370.
- 922 [63] Abdelgawad A, Azab W, Damiani AM, Baumgartner K, Will H, Osterrieder N, et al.  
923 Zebra-borne equine herpesvirus type 1 (EHV-1) infection in non-African captive  
924 mammals. *Veterinary Microbiology* 2014;169:102–6.

- 925 [64] Azab W, Kato K, Abdel-Gawad A, Tohya Y, Akashi H. Equine herpesvirus 4: Recent  
926 advances using BAC technology. *Veterinary Microbiology* 2011;150:1–14.
- 927 [65] Santos KF, Jovin SM, Weber G, Pena V, Lührmann R, Wahl MC. Structural basis for  
928 functional cooperation between tandem helicase cassettes in Brr2-mediated remodeling  
929 of the spliceosome. *Proceedings of the National Academy of Sciences* 2012;109:17418–  
930 23.
- 931 [66] Kabsch W. Xds. *Acta Crystallographica Section D: Biological Crystallography*  
932 2010;66:125–32.
- 933 [67] Bunkóczi G, Echols N, McCoy AJ, Oeffner RD, Adams PD, Read RJ. Phaser. MRage:  
934 automated molecular replacement. *Acta Crystallographica Section D: Biological*  
935 *Crystallography* 2013;69:2276–86.
- 936 [68] Emsley P, Lohkamp B, Scott WG, Cowtan K. Features and development of Coot. *Acta*  
937 *Crystallographica Section D: Biological Crystallography* 2010;66:486–501.
- 938 [69] Afonine PV, Grosse-Kunstleve RW, Echols N, Headd JJ, Moriarty NW, Mustyakimov  
939 M, et al. Towards automated crystallographic structure refinement with phenix. refine.  
940 *Acta Crystallographica Section D: Biological Crystallography* 2012;68:352–67.
- 941 [70] Williams CJ, Headd JJ, Moriarty NW, Prisant MG, Videau LL, Deis LN, et al.  
942 MolProbity: More and better reference data for improved all-atom structure validation.  
943 *Protein Science* 2018;27:293–315.
- 944 [71] Yang H, Guranovic V, Dutta S, Feng Z, Berman HM, Westbrook JD. Automated and  
945 accurate deposition of structures solved by X-ray diffraction to the Protein Data Bank.  
946 *Acta Crystallographica Section D: Biological Crystallography* 2004;60:1833–9.
- 947 [72] Kabsch W, Sander C. DSSP: definition of secondary structure of proteins given a set of  
948 3D coordinates. *Biopolymers* 1983;22:2577–637.
- 949 [73] Sievers F, Wilm A, Dineen D, Gibson TJ, Karplus K, Li W, et al. Fast, scalable  
950 generation of high-quality protein multiple sequence alignments using Clustal Omega.

- 951 Molecular Systems Biology 2011;7.
- 952 [74] Barton GJ, others. ALSCRIPT: a tool to format multiple sequence alignments. Protein  
953 Engineering Design and Selection 1993;6:37–40.
- 954 [75] DeLano WL. PyMOL 2002.
- 955 [76] Tarazona MP, Saiz E. Combination of SEC/MALS experimental procedures and  
956 theoretical analysis for studying the solution properties of macromolecules. Journal of  
957 Biochemical and Biophysical Methods 2003;56:95–116.
- 958 [77] Dey P, Bergmann T, Cuellar-Camacho JL, Ehrmann S, Chowdhury MS, Zhang M, et al.  
959 Multivalent Flexible Nanogels Exhibit Broad-Spectrum Antiviral Activity by Blocking  
960 Virus Entry. ACS Nano 2018;12:6429–42.
- 961 [78] Schasfoort RB. Handbook of surface plasmon resonance. Royal Society of Chemistry;  
962 2017.
- 963 [79] Consortium U. UniProt: a worldwide hub of protein knowledge. Nucleic Acids Research  
964 2019;47:D506–15.
- 965 [80] Labute P. The generalized Born/volume integral implicit solvent model: estimation of  
966 the free energy of hydration using London dispersion instead of atomic surface area.  
967 Journal of Computational Chemistry 2008;29:1693–8.
- 968 [81] Kaminski GA, Friesner RA, Tirado-Rives J, Jorgensen WL. Evaluation and  
969 reparametrization of the OPLS-AA force field for proteins via comparison with accurate  
970 quantum chemical calculations on peptides. The Journal of Physical Chemistry B  
971 2001;105:6474–87.
- 972 [82] Labute P. Protonate3D: assignment of ionization states and hydrogen coordinates to  
973 macromolecular structures. Proteins: Structure, Function, and Bioinformatics  
974 2009;75:187–205.
- 975 [83] Gray JJ, Moughon S, Wang C, Schueler-Furman O, Kuhlman B, Rohl CA, et al.  
976 Protein–protein docking with simultaneous optimization of rigid-body displacement and

- 977 side-chain conformations. *Journal of Molecular Biology* 2003;331:281–99.
- 978 [84] Sircar A, Chaudhury S, Kilambi KP, Berrondo M, Gray JJ. A generalized approach to  
979 sampling backbone conformations with RosettaDock for CAPRI rounds 13–19. *Proteins:  
980 Structure, Function, and Bioinformatics* 2010;78:3115–23.
- 981 [85] Chaudhury S, Gray JJ. Conformer selection and induced fit in flexible backbone  
982 protein–protein docking using computational and NMR ensembles. *Journal of Molecular  
983 Biology* 2008;381:1068–87.
- 984 [86] Weitzner J BB,M; Kilambi, K; Thottungal, R; Chaudhury, S; Wang, C; Gray. Docking  
985 Protocol (RosettaDock). 2017.
- 986 [87] Gowers RJ, Linke M, Barnoud J, Reddy TJE, Melo MN, Seyler SL, et al. MDAnalysis: a  
987 Python package for the rapid analysis of molecular dynamics simulations. Los Alamos  
988 National Lab.(LANL), Los Alamos, NM (United States); 2019.
- 989 [88] Michaud-Agrawal N, Denning EJ, Woolf TB, Beckstein O. MDAnalysis: a toolkit for  
990 the analysis of molecular dynamics simulations. *Journal of Computational Chemistry*  
991 2011;32:2319–27.
- 992 [89] van Rossum G. Python tutorial, Technical Report CS-R9526, Centrum voor Wiskunde  
993 en Informatica (CWI), Amsterdam." 1995.
- 994 [90] Bogan AA, Thorn KS. Anatomy of hot spots in protein interfaces. *Journal of Molecular  
995 Biology* 1998;280:1–9.
- 996 [91] Liu Q, Li J. Protein binding hot spots and the residue-residue pairing preference: a water  
997 exclusion perspective. *BMC Bioinformatics* 2010;11:244.
- 998 [92] Bowers KJ, Chow DE, Xu H, Dror RO, Eastwood MP, Gregersen BA, et al. Scalable  
999 algorithms for molecular dynamics simulations on commodity clusters. SC'06:  
1000 Proceedings of the 2006 ACM/IEEE Conference on Supercomputing, IEEE; 2006, p.  
1001 43–43.
- 1002 [93] Toukan K, Rahman A. Molecular-dynamics study of atomic motions in water. *Physical*

- 1003           Review B 1985;31:2643.
- 1004   [94] Banks JL, Beard HS, Cao Y, Cho AE, Damm W, Farid R, et al. Integrated modeling  
1005           program, applied chemical theory (IMPACT). *Journal of Computational Chemistry*  
1006           2005;26:1752–80.
- 1007   [95] Humphrey W, Dalke A, Schulten K, others. VMD: visual molecular dynamics. *Journal*  
1008           of Molecular Graphics 1996;14:33–8.
- 1009   [96] Chaudhury S, Berrondo M, Weitzner BD, Muthu P, Bergman H, Gray JJ. Benchmarking  
1010           and analysis of protein docking performance in Rosetta v3. 2. *PloS One* 2011;6:e22477.  
1011

1012 **Figures**

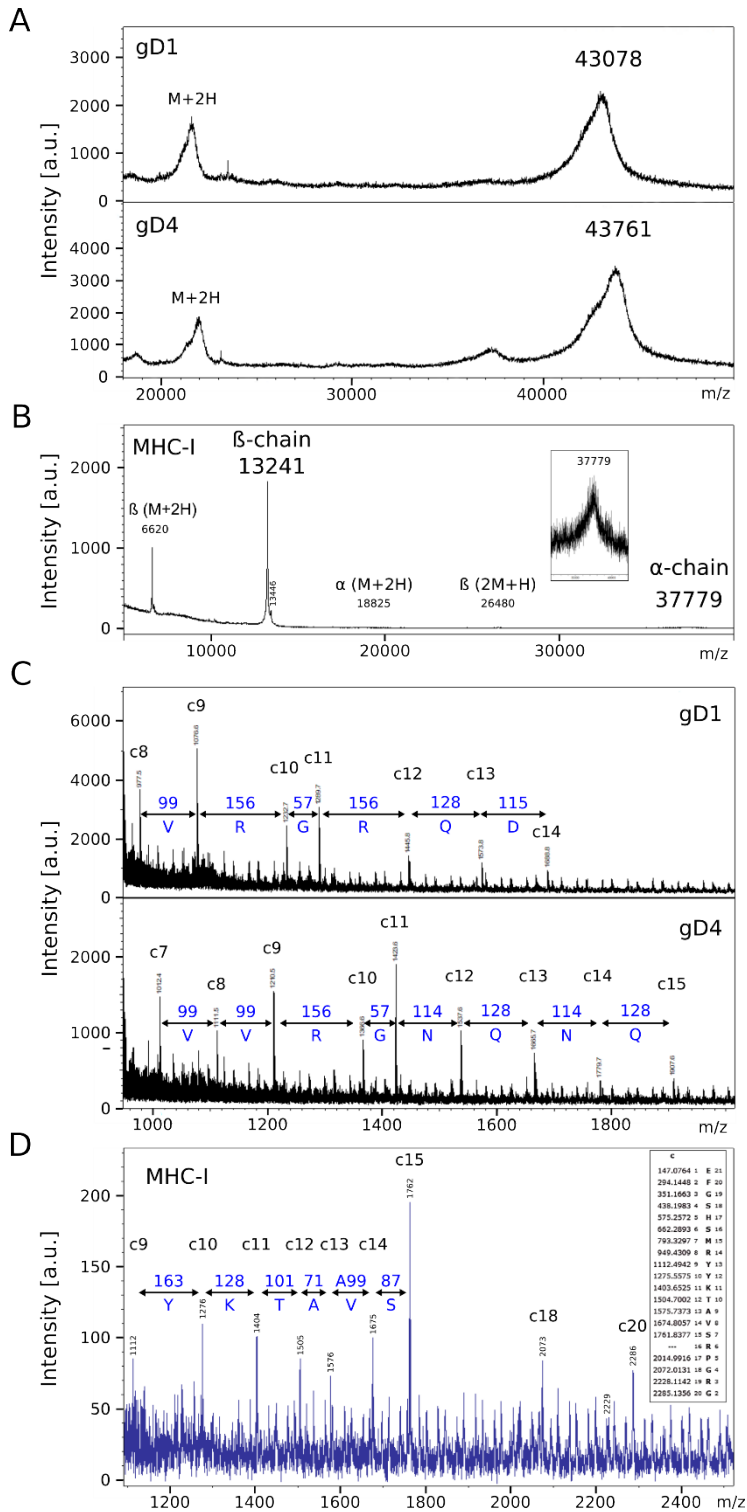

1013

1014 **Figure 1: Mass spectrometric analysis of gD1 and gD4.**

1015 (A) Intact protein mass analysis of recombinant gD1 (top) and gD4 (bottom) including N-  
1016 terminal residues (EF: glutamic acid and phenylalanine) from *Eco*RI restriction site, TEV

1017 cleavage site and His<sub>6</sub>-tag on sinapinic acid (SA) matrix. (B) Intact protein mass analysis of  
1018 recombinant MHC-I complex comprised of  $\beta$ 2m and MHC-I- $\alpha$ -chain (insert zoom) including  
1019 the same additional residues as gD1 and gD4. (C) In-source decay (ISD) spectra of  
1020 recombinant gD1 (top), gD4 (bottom), and (D) MHC-I to ascertain the correct N-termini,  
1021 insert: Theoretical c-ion series including the N-terminal EF extension.  
1022



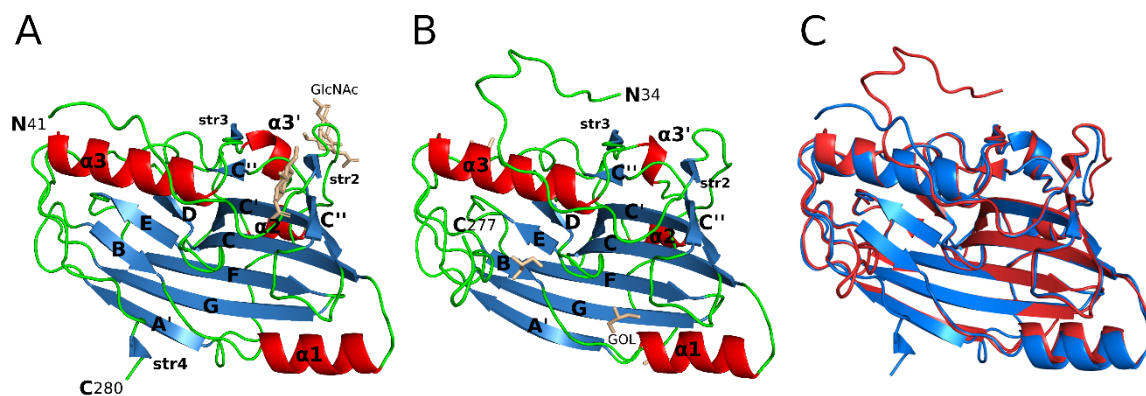

1023

1024 **Figure 2: Crystal structure comparison of gD1 and gD4.**

1025 Cartoon representation of (A) gD1 (2.45 Å resolution, PDB-ID: 6SQJ) and (B) gD4 (1.9 Å  
1026 resolution, PDB-ID: 6TM8) monomer crystal structures. Molecule orientation is identical and  
1027 secondary structures were assigned with dssp [72]. Helices are displayed in red, sheets in blue,  
1028 and loops in green. N-acetylglucosamine (GlcNAc) and glycerol (GOL) molecules are shown  
1029 in stick representation in beige. (C) Superposition of the crystal structures of gD1 (blue, PDB-  
1030 ID 6SQJ) and gD4 (red, PDB-ID 6TM8). GlcNAc and glycerol molecules are not shown.

1031

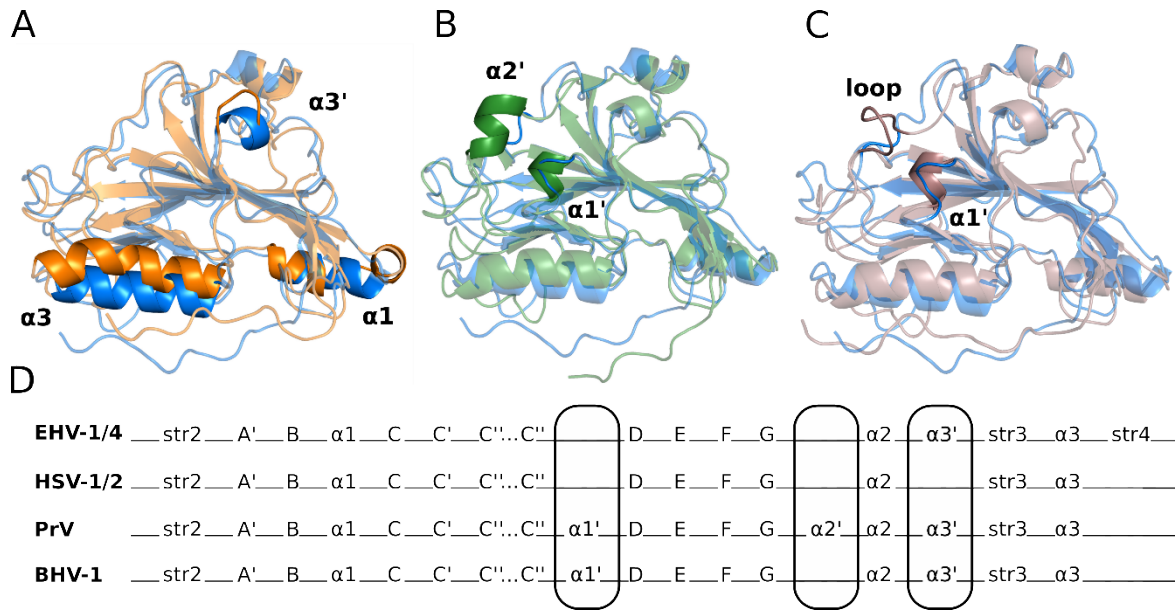

1032

**Figure 3: Glycoprotein D from alphaherpesviruses have a similar crystal and secondary structure.**

Superposition of crystal structures in cartoon representation of gD from EHV-1 (blue, PDB-ID 6SQJ) with (A) HSV-1 (orange, PDB-ID 2C36), (B) PrV (green, PDB-ID 5X5V), and (C) BoHV-1 (brown, PDB-ID 6LS9) gD. Main differences in global fold are highlighted. (D) Comparison of secondary structure elements of EHV-1/4, HSV-1/2, PrV, and BoHV-1 gD. Main differences in global fold are encircled.

1033

1034

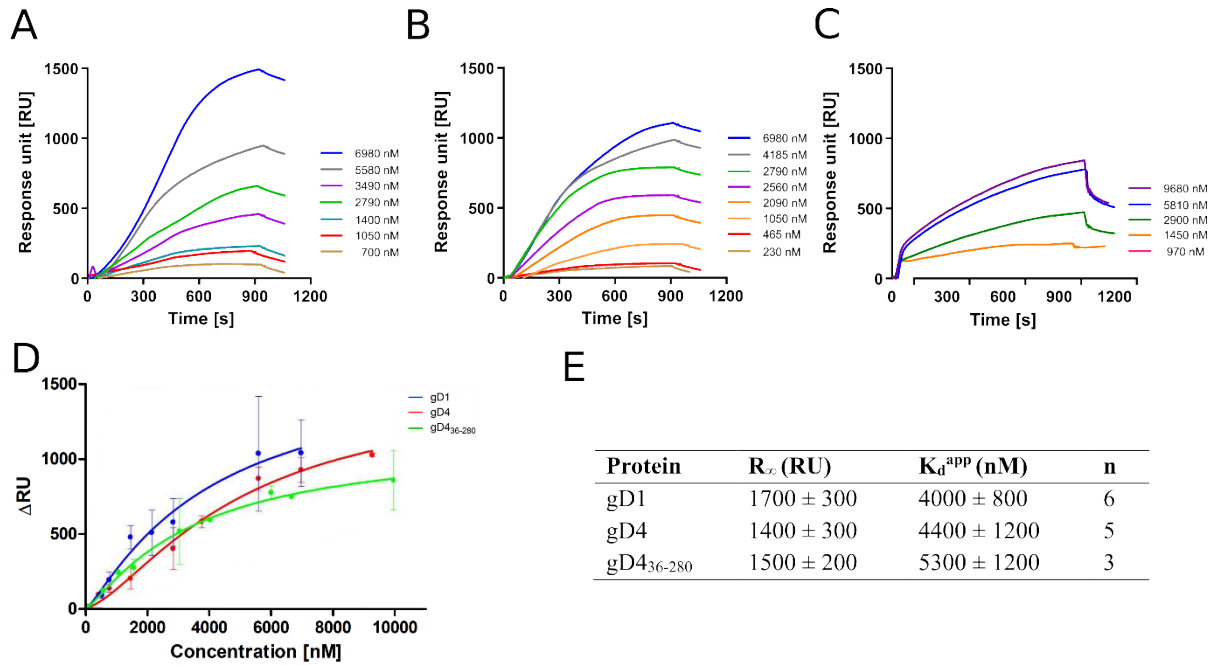

1035

1036 **Figure 4: Binding affinities of gD1, gD4 and gD4<sub>36-280</sub> to the entry receptor MHC-I are**  
 1037 **in micro molar range.**

1038 (A, B, C) Representative SPR sensorgram profiles of recombinant gDs binding to amine-

1039 coupled recombinant MHC-I. Data were collected for several independent experiments [(A)

1040 gD1 n=6, (B) gD4 n=5, (C) gD4<sub>36-280</sub> n=3). (D) Binding curves for different gD

1041 concentrations from at least three independent experiments. Displayed are means with

1042 standard deviation (SD). The solid lines represent a fit of a Hill-Wand model to the data. (E)

1043 Parameters obtained from SPR binding curves of gD1, gD4, and gD4<sub>36-280</sub>.  $R_{\infty}$  is the

1044 maximum signal obtained from the bound protein;  $K_d^{app}$  is the apparent equilibrium

1045 dissociation constant, n corresponds to the number of independent experiments.

1046

1047

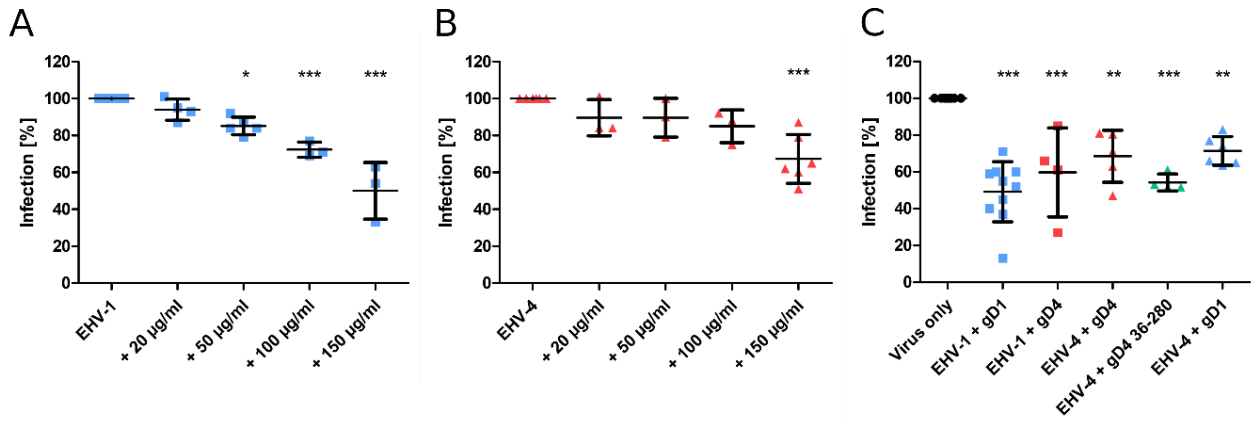

1048

**Figure 5: Recombinant gD1, gD4 and gD4<sub>36-280</sub> blocks EHV-1 and EHV-4 infection in ED cells.**

(A) EHV-1 and (B) EHV-4 virus entry into ED cells blocked by different concentrations of gD1 and 4, respectively, and analyzed by flow cytometry. Cells were incubated with soluble proteins for 1 h on ice and infected with either EHV-1 or EHV-4 at MOI = 0.1. After 1 h, viruses on the cell surface were removed with citrate buffer and GFP levels were analyzed after 24-48 h by flow cytometry. (C) Plaque reduction assay of EHV-1 and EHV-4 with recombinant protein. ED cells were incubated for 1 h on ice with 150 µg/ml gD1, gD4 or gD4<sub>36-280</sub> and infected with 100 PFU of each virus. After 1 h, viruses on the cell surface were removed with citrate buffer and cells were overlaid with methylcellulose. GFP plaques were counted after 48 h. The experiment was repeated independently three times for each protein. Plaque numbers were normalized to infection levels without recombinant proteins. Statistical analysis was done using one-way ANOVA Bonferroni's multiple comparison test, \* indicates  $P \leq 0.05$ , \*\* indicates  $P \leq 0.01$ , \*\*\* indicates  $P \leq 0.001$ . Error bars represent mean with SD.

1049

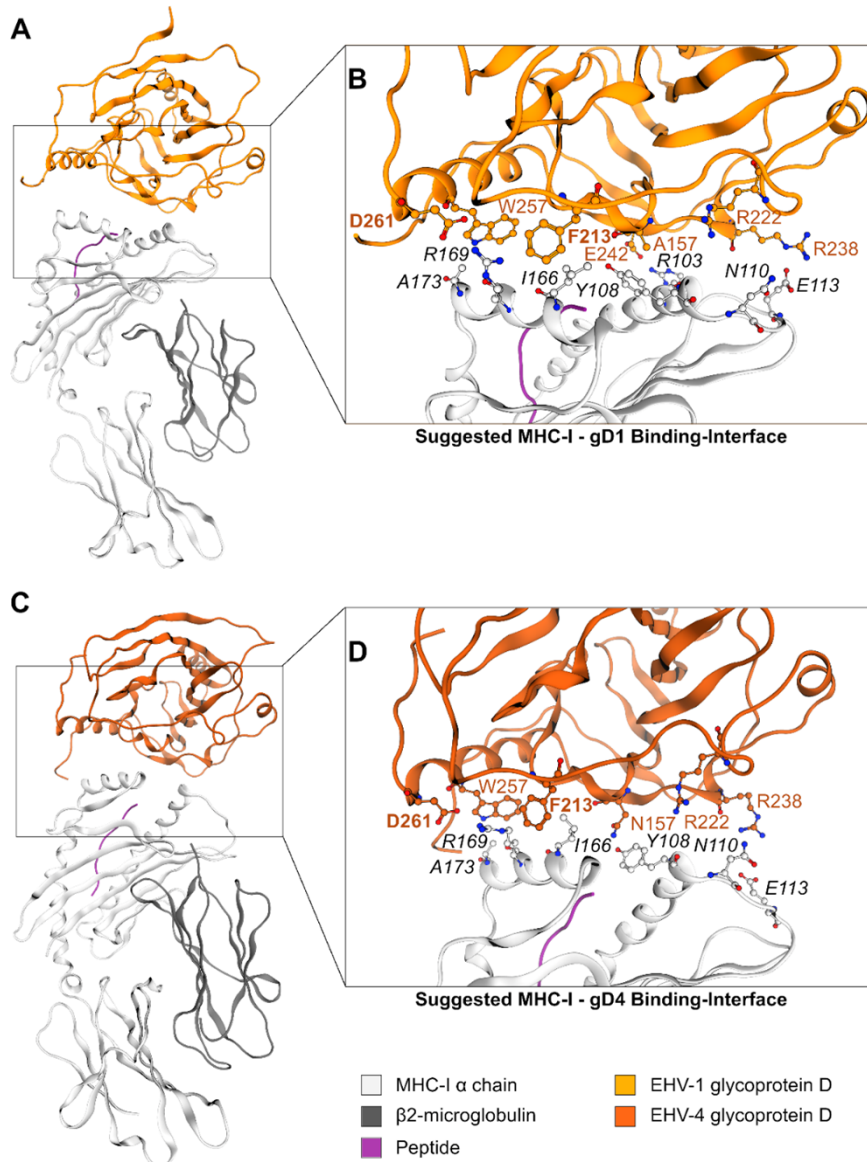

1050

### Figure 6: The gD1- and gD4-MHC-I interface.

(A) Suggested model of the MHC-I – gD1 complex and (B) detailed view on the hypothesized binding interface. (C) Suggested model of the MHC-I – gD4 complex and (D) detailed view on the hypothesized binding interface. EHV gD residues are highlighted in orange and hot spot residues additionally in bold font. Color-code: grey ribbon – MHC-I, dark grey ribbon –  $\beta$ 2m, orange ribbon – gD1, dark orange ribbon – gD4, purple ribbon – peptide, grey/orange balls – carbon atoms, blue balls – nitrogen atoms, red balls – oxygen atoms.

1051

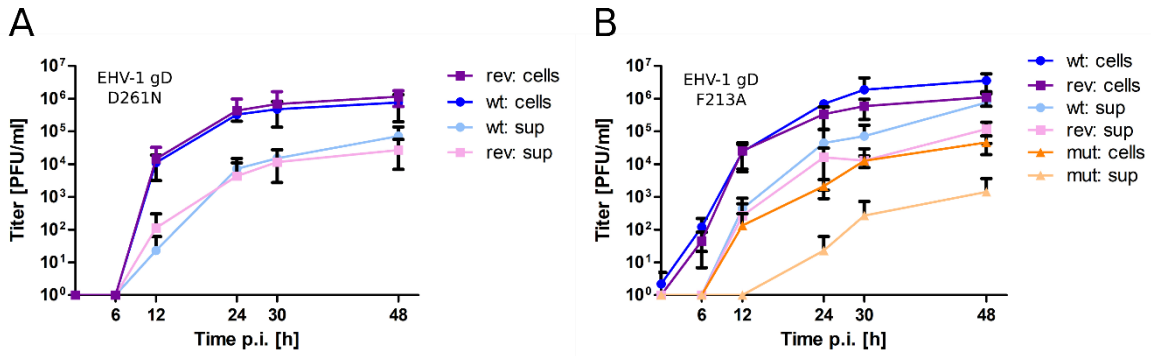

1052

**Figure 7: Mutating gD1 residues D261N and F213A impairs EHV-1 growth in ED cells.**

Multi-step growth kinetics of EHV-1 parental virus and gD mutants. ED cells were infected with an MOI of 0.01, cells and supernatant were collected separately at indicated time points post infection and titrated on ED cells. Shown are means with standard deviation (SD) of three independent experiments. (A) EHV-1 parental virus (blue colors) and EHV-1-gD<sub>D261N</sub> (violet colors). (B) EHV-1 parental virus (blue colors), EHV-1-gD<sub>F213A</sub> (orange colors) and EHV-1-gD<sub>F213A</sub> (violet colors).

1053

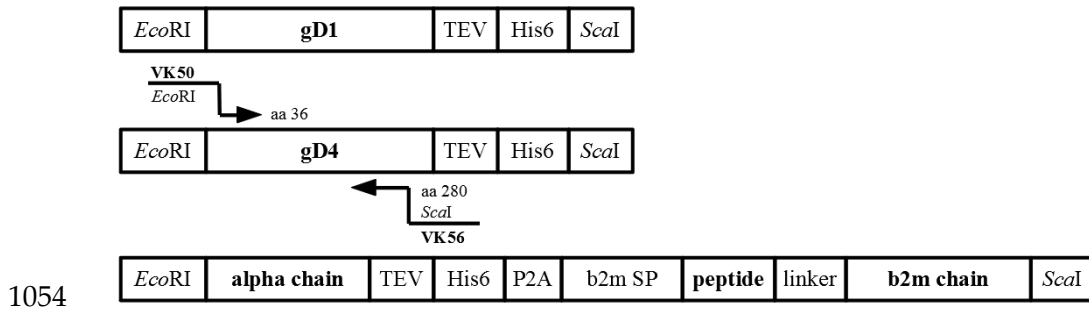

**Figure 8: Synthetic genes used for cloning.**

Schematic representation of synthetic genes for protein production of gD1, gD4, equine MHC-I 3.1 with cloning strategy for gD436-280.

1055

## 1056 **Supporting information**

1057 **Figure S 1: SDS-PAGE and western blot of MHC-I, gD1, and gD4.** (A) Coomassie stained  
1058 SDS-PAGE on 12% gel. For MHC-I, only the  $\alpha$ -chain is visible in (A) and (B). M = marker.  
1059 (B) Western blot: MHC-I (50  $\mu$ g/ml), gD1 (5  $\mu$ g/ml), and gD4 (5  $\mu$ g/ml) detected with 1:1000  
1060 rabbit anti-His<sub>6</sub> antibody and 1:10000 goat anti-rabbit-HRP as secondary antibody.

1061 **Figure S 2: Protein purification by size exclusion chromatography (SEC).** Representative  
1062 SEC curves of concentrated (A) gD1, (B) gD4, (C) gD4<sub>36-280</sub>, and (D) MHC-I run on  
1063 Superdex 200 16/600 after purification through immobilized metal ion affinity  
1064 chromatography (IMAC). Solid curves show UV absorbance at 280nm and the dotted curves  
1065 at 260nm.

1066 **Figure S 3: SDS-PAGE of protein purification by size exclusion chromatography (SEC).**  
1067 Representative size exclusion chromatography (SEC) fractions of proteins produced in insect  
1068 cells on Coomassie stained 12% sodium dodecyl sulfate (SDS) gels. (A) gD1 (approximately  
1069 43 kDa), (B) gD4 (approximately 43 kDa), (C) gD4<sub>36-280</sub> (approximately 30 kDa), and (D)  
1070 MHC-I (comprised of  $\alpha$ -chain with an approximate size of 38 kDa and  $\beta$ 2m (with the linker  
1071 and peptide) with an approximate size of 13 kDa). M = marker, FT = flow through affinity  
1072 chromatography, E = elution affinity chromatography, L = loaded on SEC column.

1073 **Figure S 4: Tandem mass spectrometry (MS/MS) of in-gel digested gD1 and gD4.**  
1074 Exemplary spectra are shown which confirm the identity of the analyzed proteins and the  
1075 integrity of their termini. The inserts display the theoretical b and y fragments ions.  
1076 (A) N-terminal peptide of gD1 generated by cleavage with Asp-N endoproteinase (M+H=  
1077 1574.90, pos. 001-013, sequence EFEKAKRAVRGRQ.D); (B) N-terminal peptide of gD4  
1078 obtained by trypsin cleavage (M+H=1013.52, pos. 001-007, sequence EFENYRR); (C)  
1079 C-terminal peptide of gD4 including the His<sub>6</sub>-tag, generated by Glu-C endoproteinase  
1080 (M+H=1563.74, pos. 323-334, sequence ENLYFQG-H<sub>6</sub>).



1081 **Figure S 5: Size exclusion chromatography (SEC) combined with multi-angle static light**  
1082 **scattering (MALS) analysis of gD1.**

1083 The gD1 crystal structure consists of a homodimer with two ions interpreted as magnesium  
1084 originating from the crystallization solution, trapped between them. The ionic interaction  
1085 together with a high Complex Formation Significance Score of 0.765 (PDB Proteins,  
1086 Interfaces, Structures and Assemblies (PISA) server [www.ebi.ac.uk/pdbe/pisa/](http://www.ebi.ac.uk/pdbe/pisa/)) suggested that  
1087 gD1 might form a dimer on the virus envelope as has been proposed for HSV-1 gD [26]. To  
1088 evaluate whether recombinant gD of EHV-1 has a homodimeric and/or monomeric form in  
1089 solution, molecular mass calculation based on SEC-MALS analysis was performed for gD1.  
1090 Green curve represents the normalized refractive index trace (intensity, right y-axis) for gD1  
1091 eluted from a Superdex 200 10/300 column. Blue line under the peak corresponds to the  
1092 averaged molecular mass distribution (left y axis) across the peak. Exclusively the monomeric  
1093 form with an approximate molecular weight of 44 kDa was detected. It can be concluded that  
1094 gD1 is a monomer in solution.

1095 **Figure S 6: Sequence alignment of EHV-1 with HSV-1 and PrV.** Sequence alignment  
1096 based on secondary structures of gD1 with (A) HSV-1 (PDB ID 2C3A) and (B) PrV (PDB ID  
1097 5X5V) gD according to dssp [72]. Sheets are indicated as pink arrows, helices as blue  
1098 cylinder, disulfide bonds as yellow boxes, glycosylation sites in gD1 as green dots, and  
1099 magnesium coordinating residues in gD1 as purple dots. Labels correspond to the naming  
1100 scheme presented by Li et al. [29].

1101 **Figure S 7: Ramachandran plots for modeled MHC-I.** Ramachandran plots for (A) MHC-I  
1102 (gene 3.1) and (B) equine  $\beta$ 2m. Symbol code: green point-residue with favorable geometry,  
1103 yellow point- residue with allowed geometry.
